# Supplementary material for: In silico exploration of acetic acid driven multicomponent synthesis: design, characterization, and antioxidant evaluation of spiroacridines and spiroquinolines
Source: Royal Society of Chemistry journal article supplement (doi:10.1039/d4su00024b), 2024-01-01
Supplement: d4su00024b1.pdf [file d4su00024b1.pdf]

## Supporting Information

### ***In Silico* Exploration of Acetic Acid driven Multicomponent Synthesis: Design, Characterization, and Antioxidant Evaluation of Spiroacridines and Spiroquinolines**

Subham G. Patel<sup>a,b</sup>, Dipti B. Upadhyay<sup>a</sup>, Nirajkumar V. Shah<sup>b</sup>, Mehul P. Parmar<sup>a</sup>, Paras J. Patel<sup>a</sup>, Apoorva Malik<sup>c</sup>, Rakesh K Sharma<sup>c</sup>, and Hitendra M. Patel<sup>a\*</sup>

<sup>a</sup> *Department of Chemistry, Sardar Patel University, Vallabh Vidyanagar- 388120, Gujarat, India*

<sup>b</sup> *J & J College of Science, Nadiad – 387001, Kheda, Gujarat, India*

<sup>c</sup> *Sustainable Materials and Catalysts Research Laboratory (SMCRL), Department of Chemistry, Indian Institute of Technology, Jodhpur, India*

\* Corresponding Author: Hitendra M. Patel, E-mail: [hm\\_patel@spuvvn.edu](mailto:hm_patel@spuvvn.edu).

### Table of Contents

| Sr. No. | Contents                                                                                               | Page No. |
|---------|--------------------------------------------------------------------------------------------------------|----------|
| 1       | <sup>1</sup> H-NMR & <sup>13</sup> C{ <sup>1</sup> H}-NMR Spectral data of all Compounds <b>4a-x</b> . | S2-S25   |
| 2       | HRMS Spectral data of all Compounds <b>4a-x</b> .                                                      | S26-S33  |
| 3       | ADMET properties of Compound <b>4a</b> and <b>4v</b> .                                                 | S34      |

Figure S1:  $^1\text{H-NMR}$  (500 MHz,  $\text{DMSO-d}_6$ ) of Compound 4a.

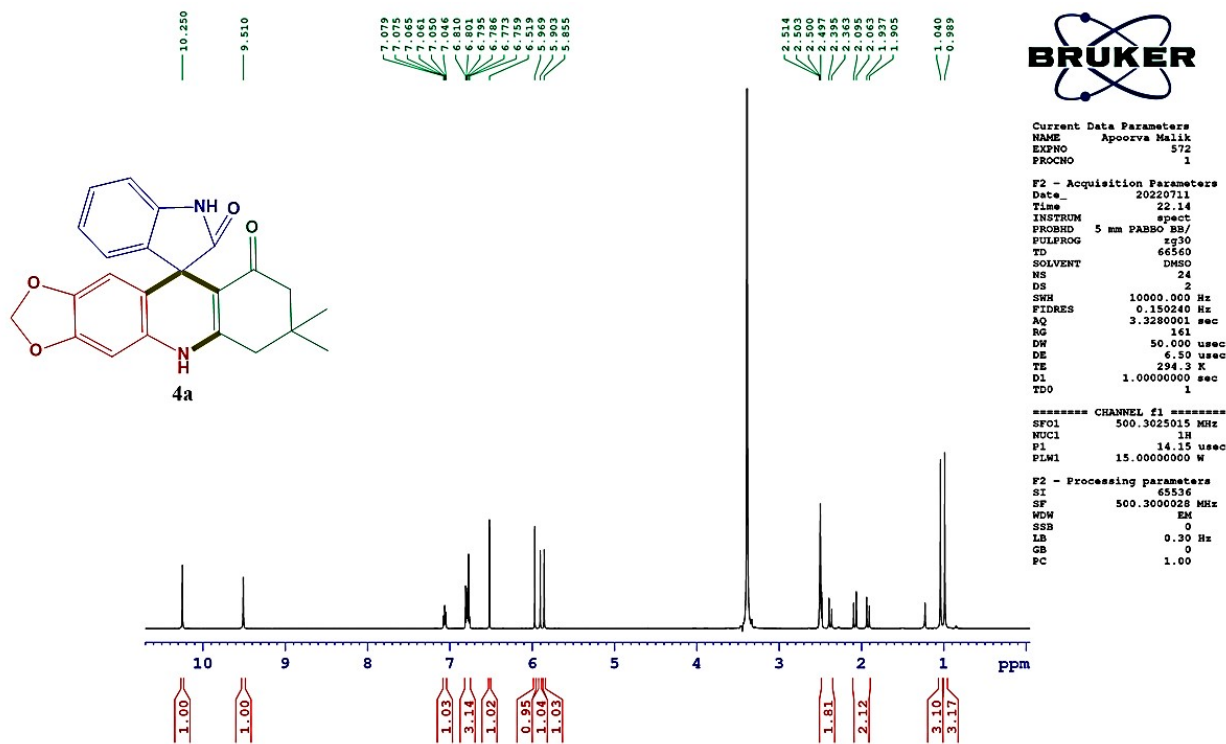

Figure S2:  $^{13}\text{C-NMR}$  (125 MHz,  $\text{DMSO-d}_6$ ) of Compound 4a.

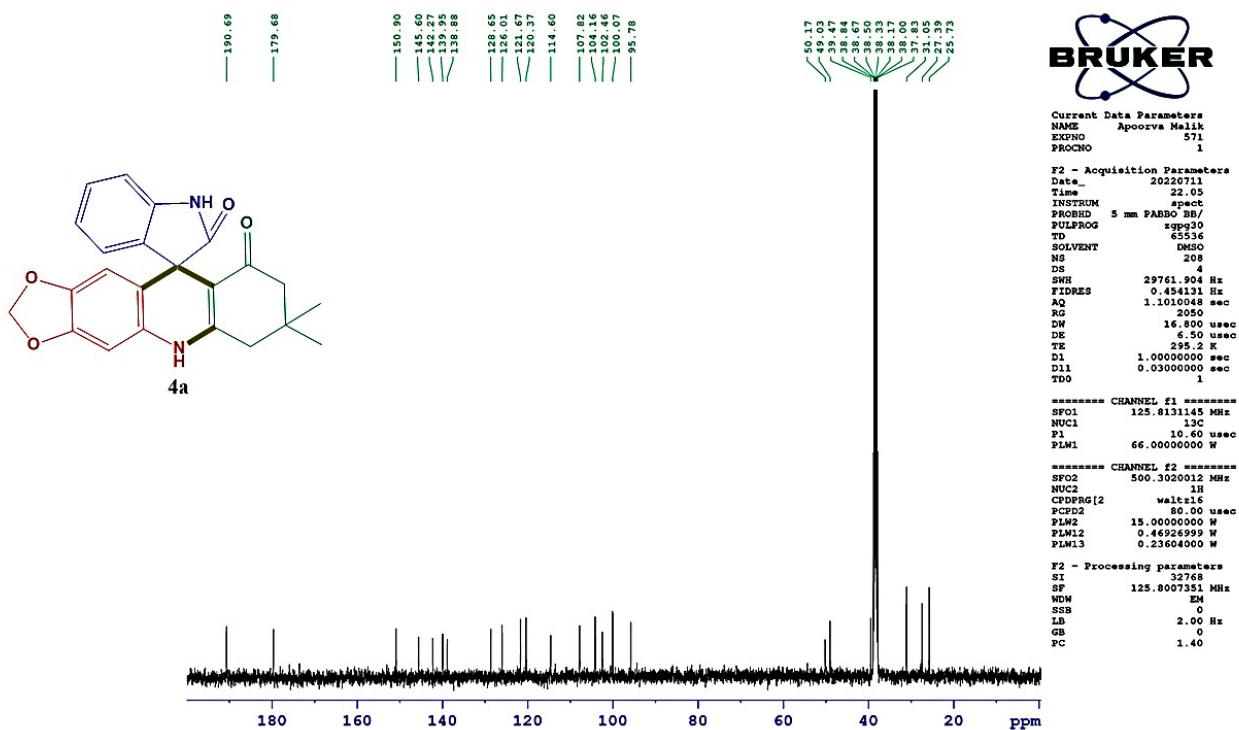

Figure S3:  $^1\text{H-NMR}$  (500 MHz,  $\text{DMSO-d}_6$ ) of Compound **4b**.

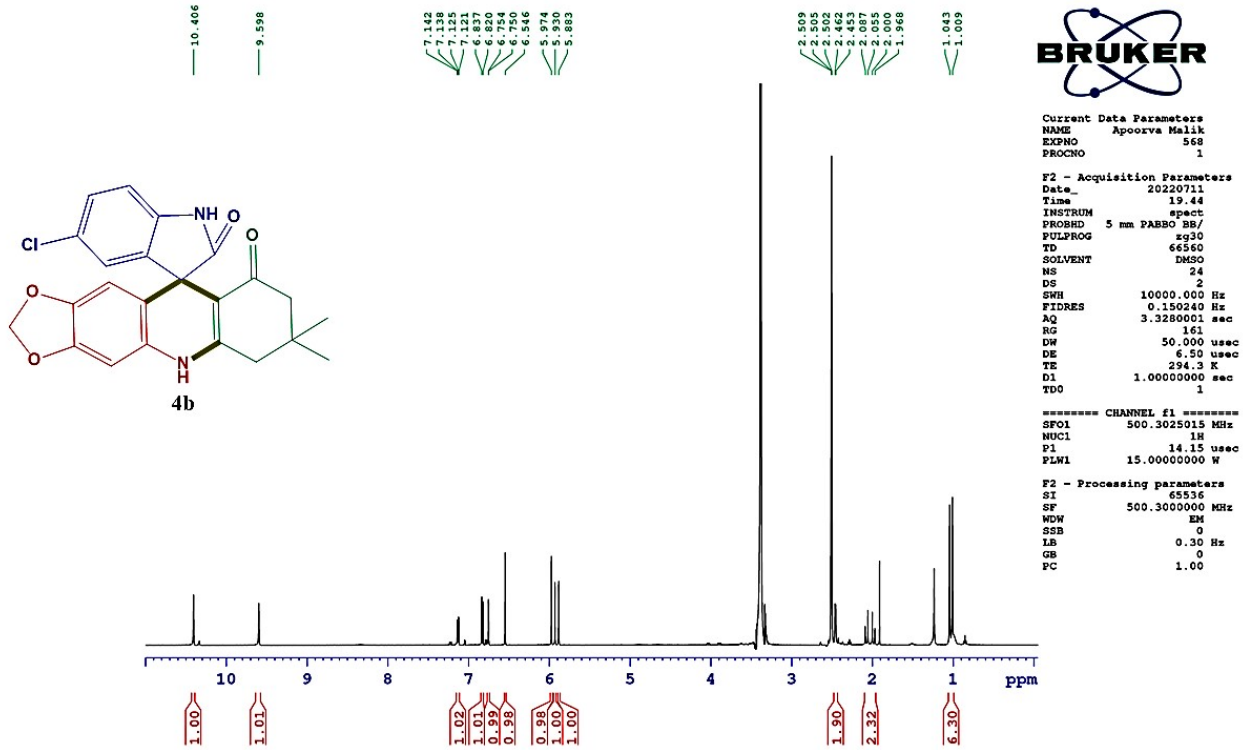

Figure S4:  $^{13}\text{C-NMR}$  (125 MHz,  $\text{DMSO-d}_6$ ) of Compound **4b**.

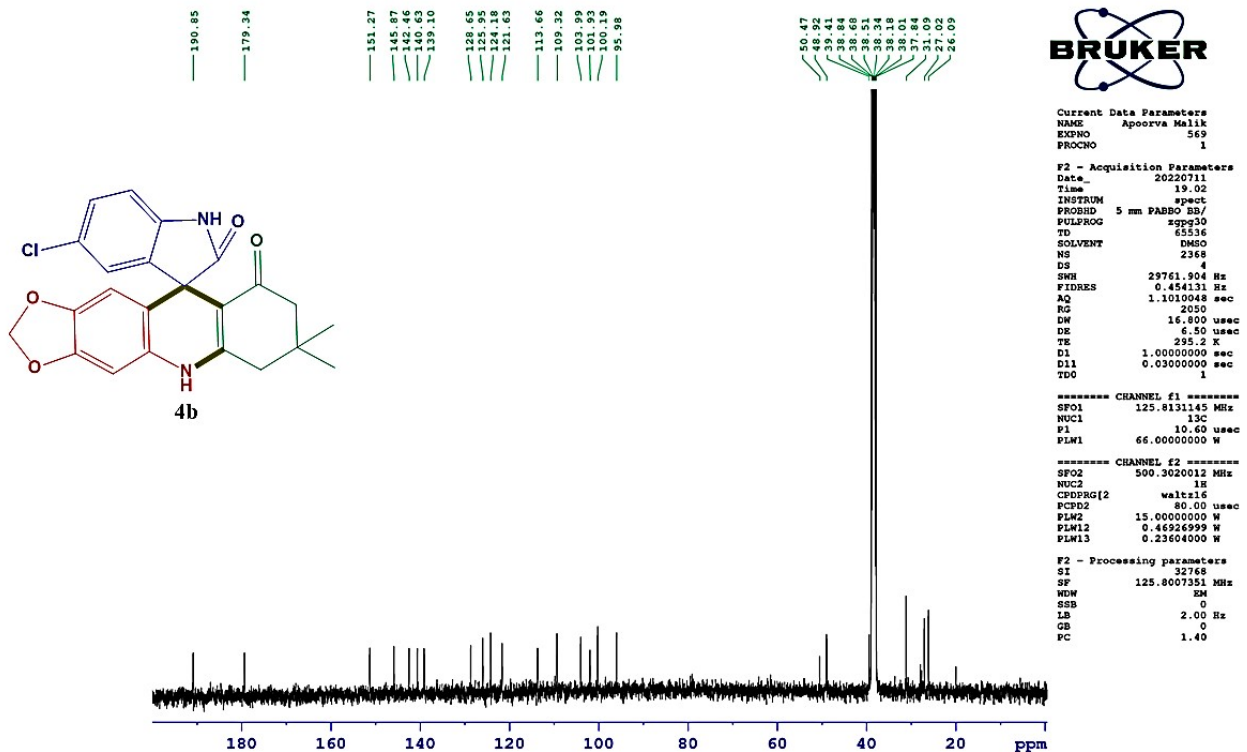

Figure S5: <sup>1</sup>H-NMR (500 MHz, DMSO-d<sub>6</sub>) of Compound 4c.

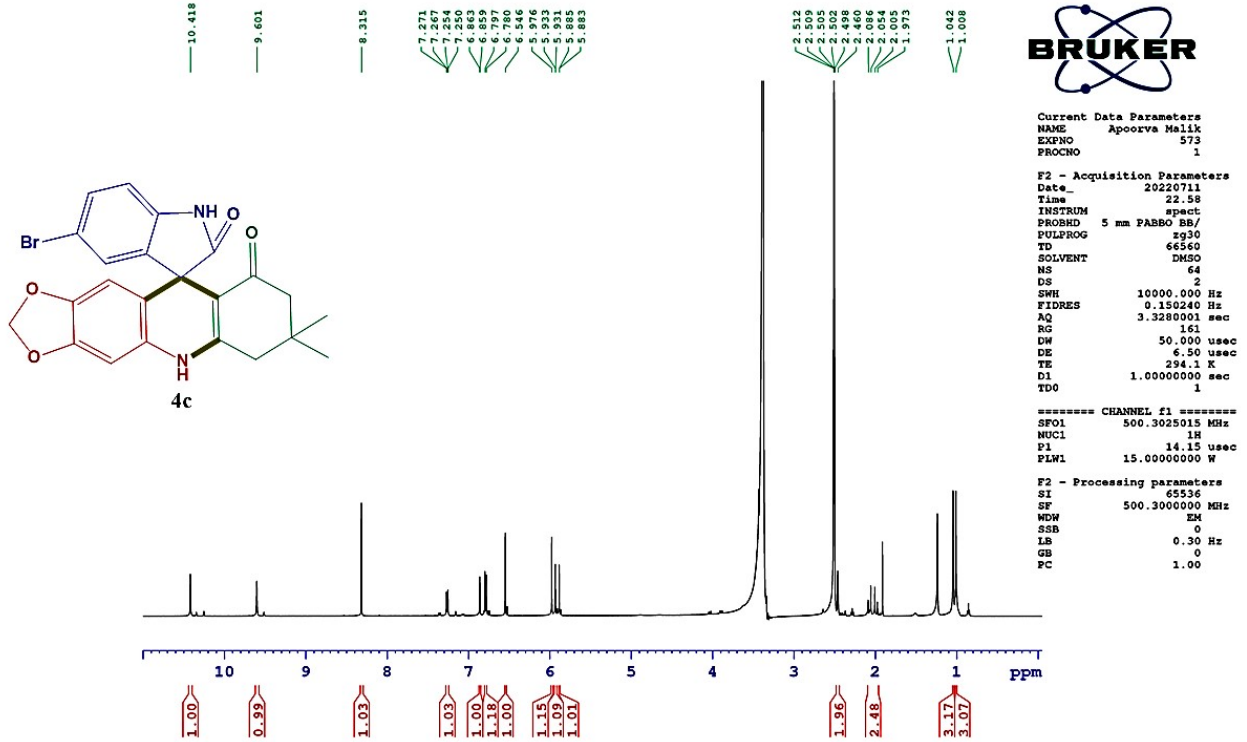

Figure S6: <sup>13</sup>C-NMR (125 MHz, DMSO-d<sub>6</sub>) of Compound 4c.

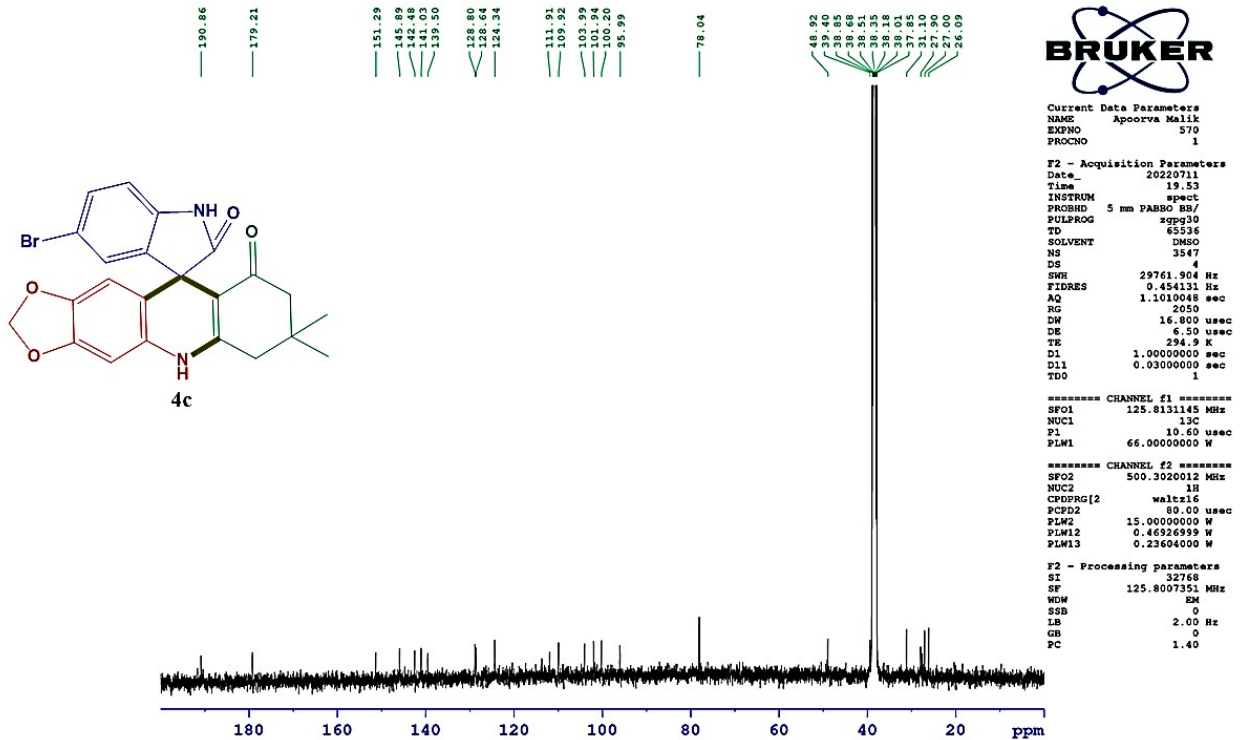

Figure S7:  $^1\text{H-NMR}$  (500 MHz,  $\text{DMSO-d}_6$ ) of Compound 4d.

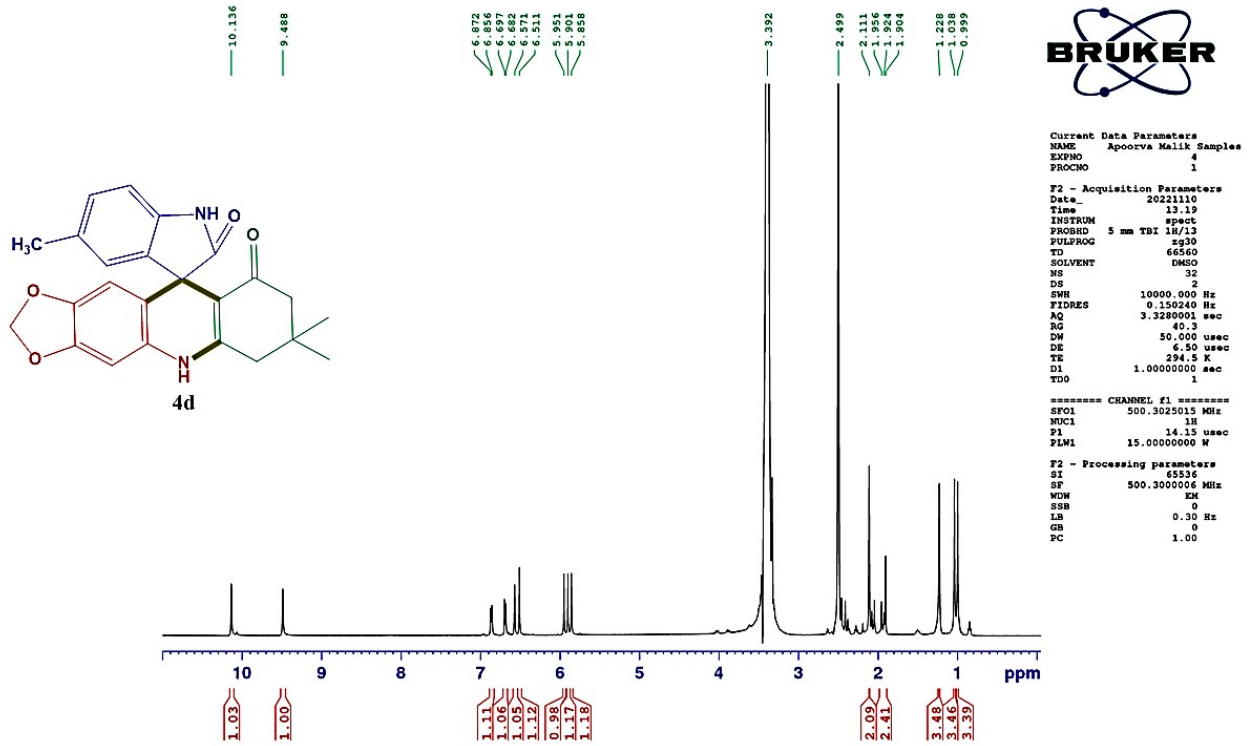

Figure S8:  $^{13}\text{C-NMR}$  (125 MHz,  $\text{DMSO-d}_6$ ) of Compound 4d.

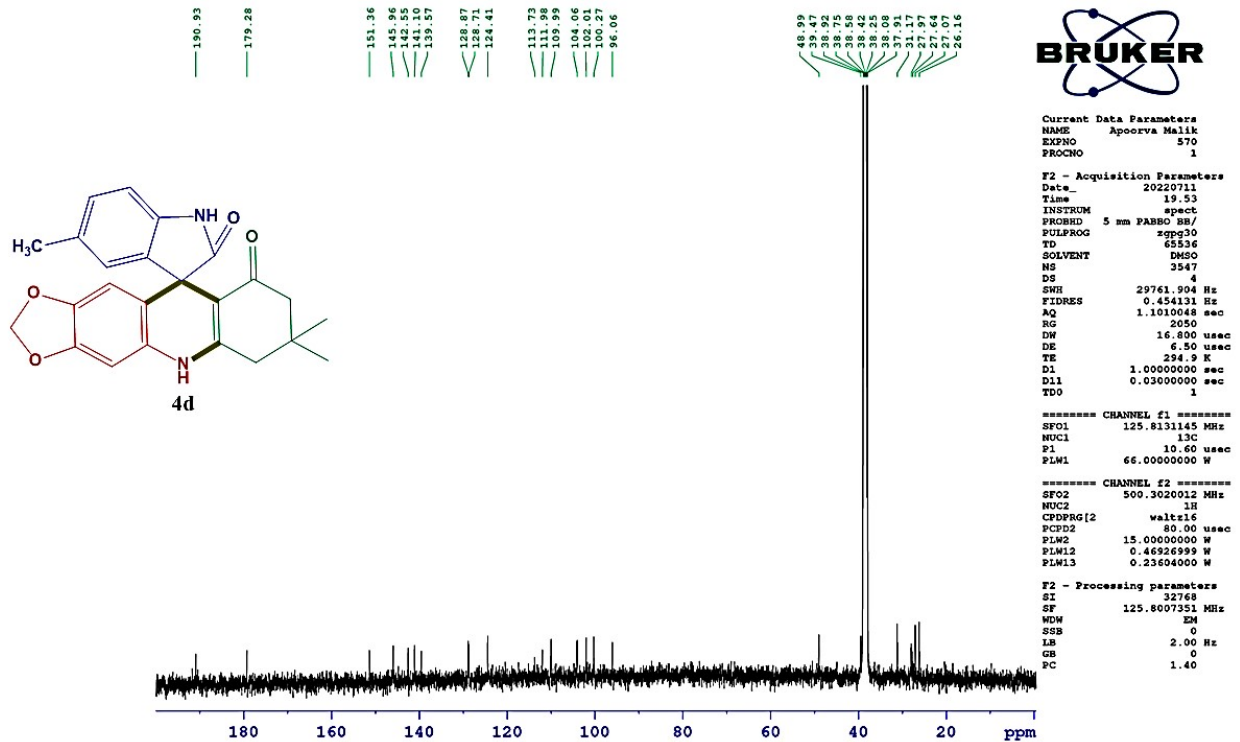

Figure S9:  $^1\text{H-NMR}$  (500 MHz,  $\text{DMSO-d}_6$ ) of Compound 4e.

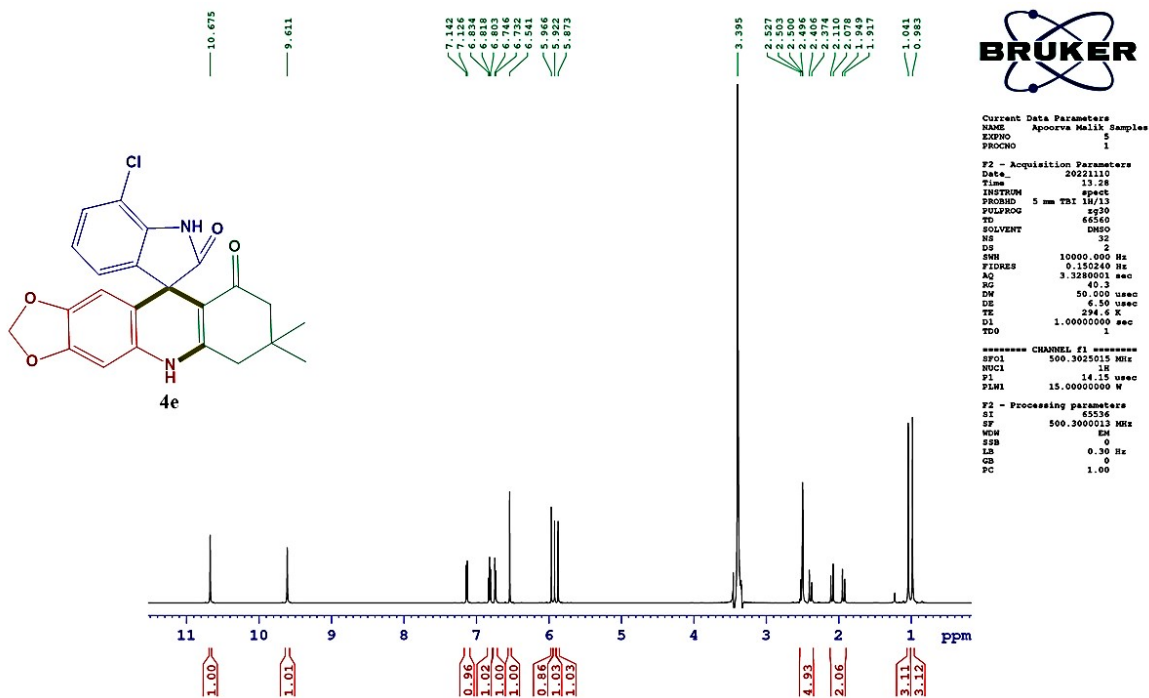

Figure S10:  $^{13}\text{C-NMR}$  (125 MHz,  $\text{DMSO-d}_6$ ) of Compound 4e.

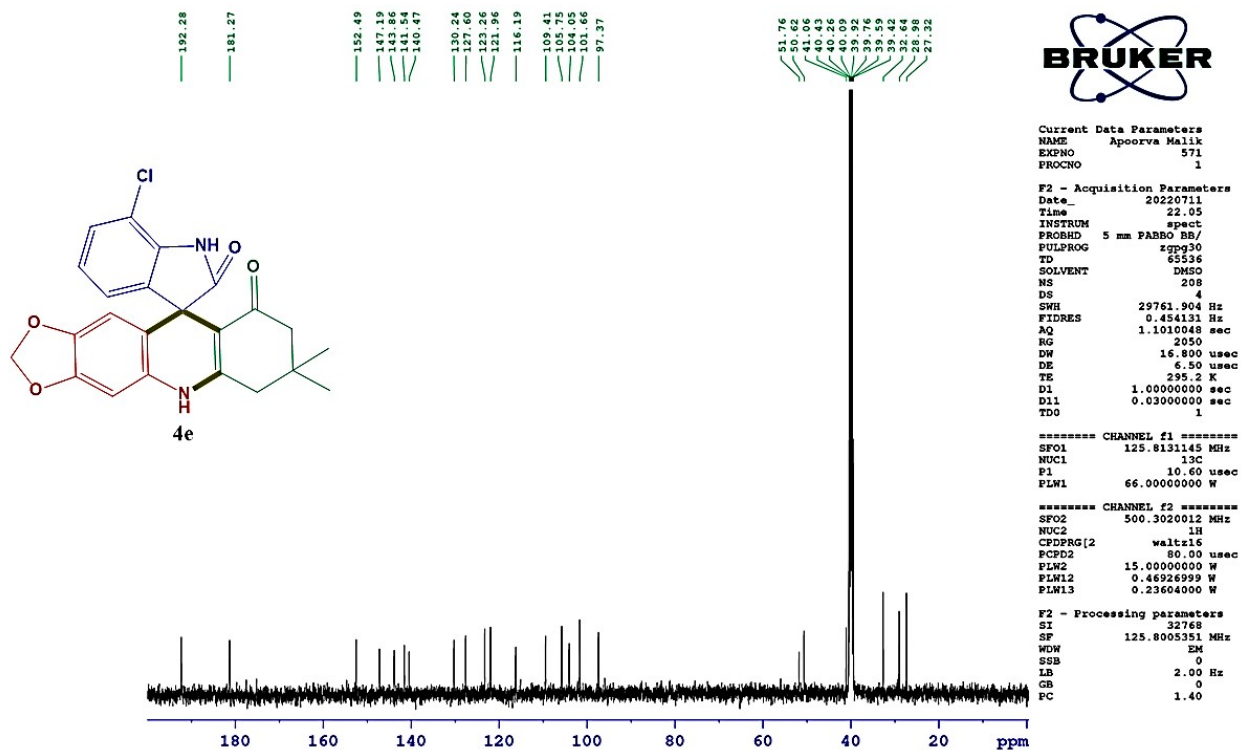



Figure S11: <sup>1</sup>H-NMR (500 MHz, DMSO-d<sub>6</sub>) of Compound 4f.

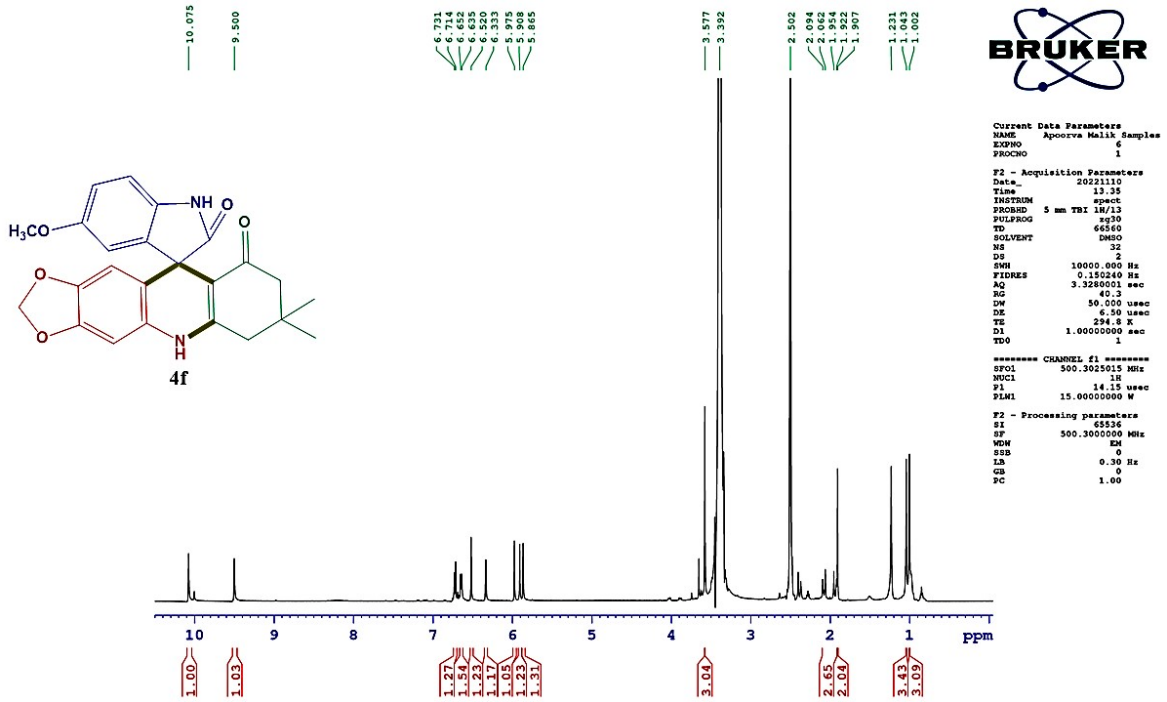

Figure S12: <sup>13</sup>C-NMR (125 MHz, DMSO-d<sub>6</sub>) of Compound 4f.

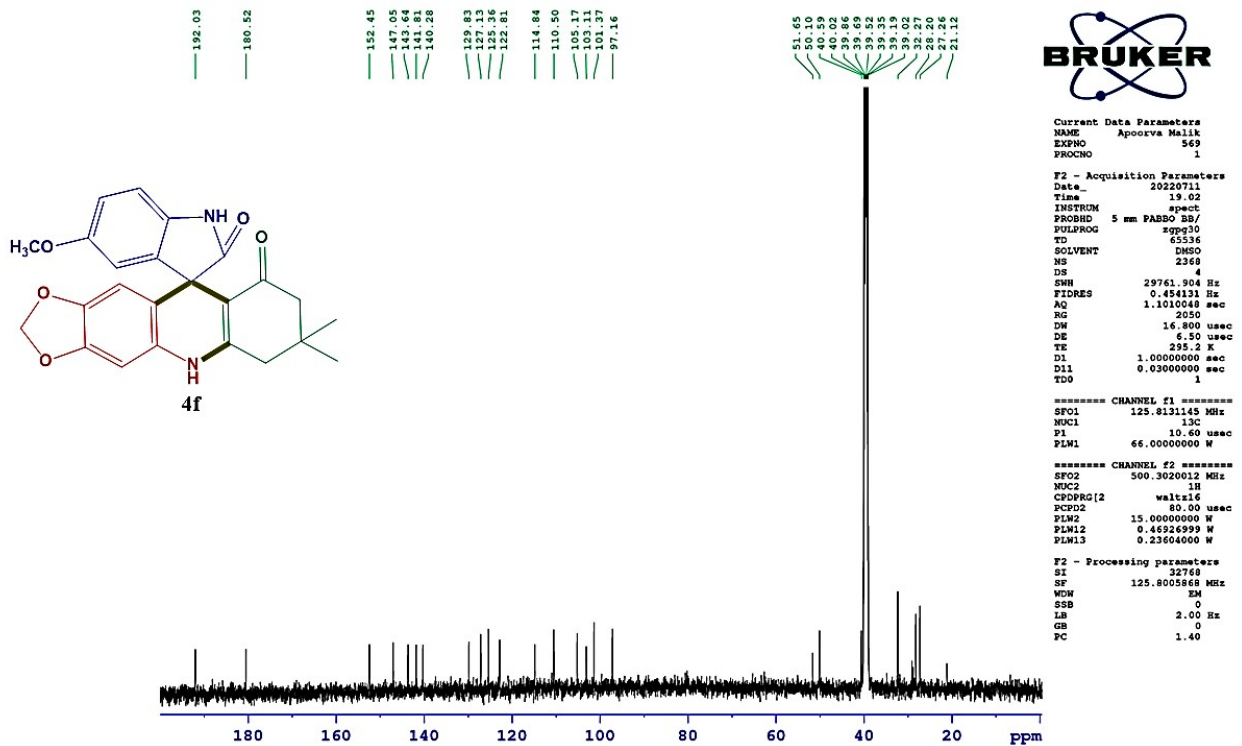

Figure S13: <sup>1</sup>H-NMR (500 MHz, DMSO-d<sub>6</sub>) of Compound 4g.

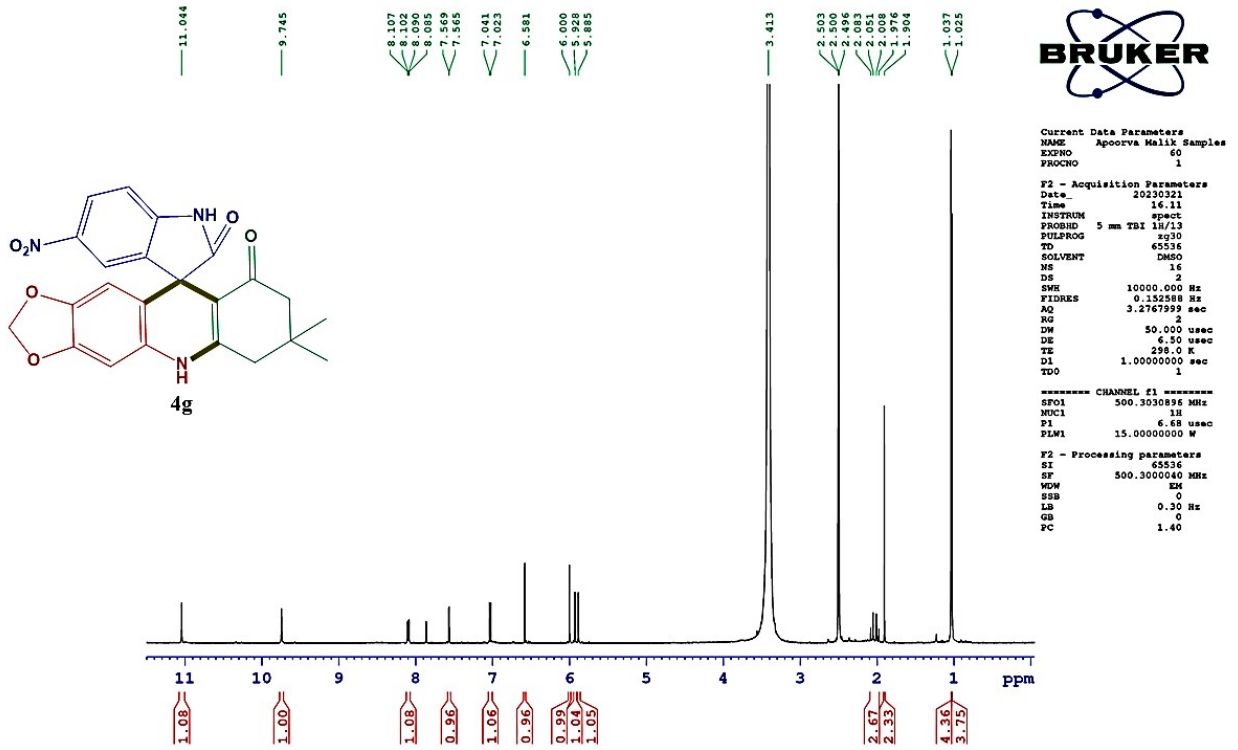

Figure S14: <sup>13</sup>C-NMR (125 MHz, DMSO-d<sub>6</sub>) of Compound 4g.

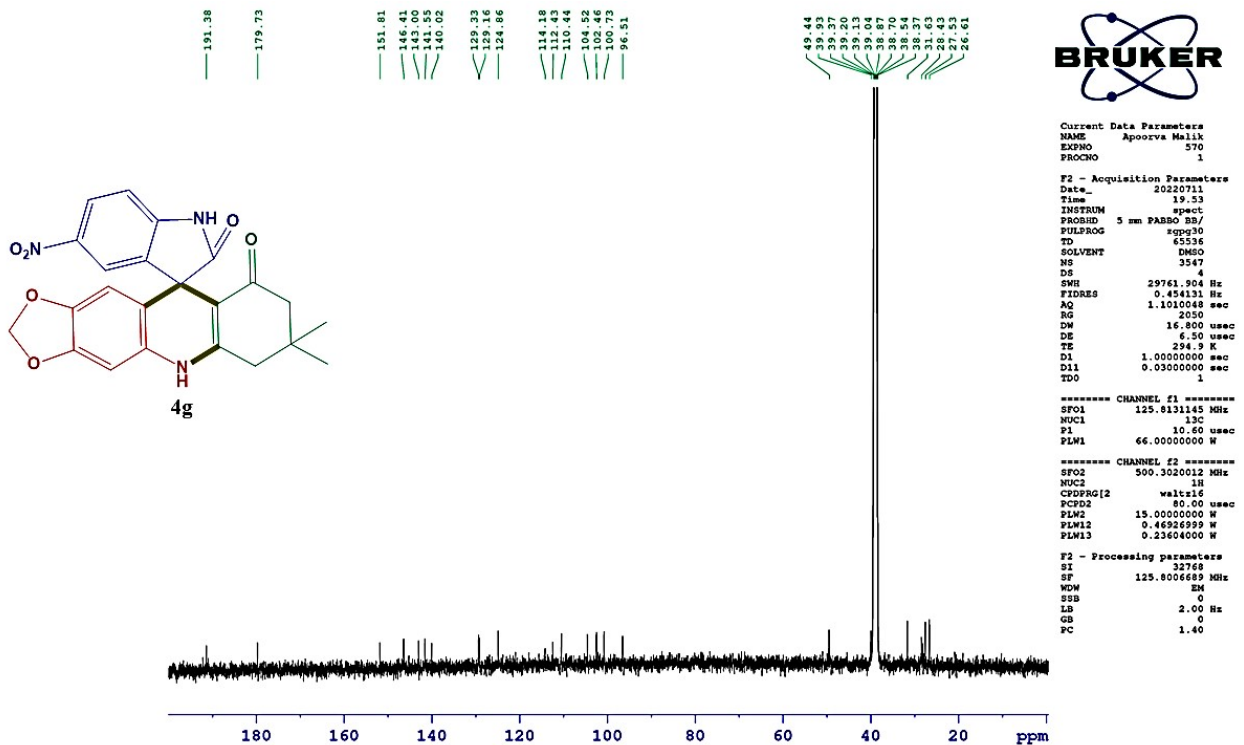



Figure S15: <sup>1</sup>H-NMR (500 MHz, DMSO-d<sub>6</sub>) of Compound 4h.

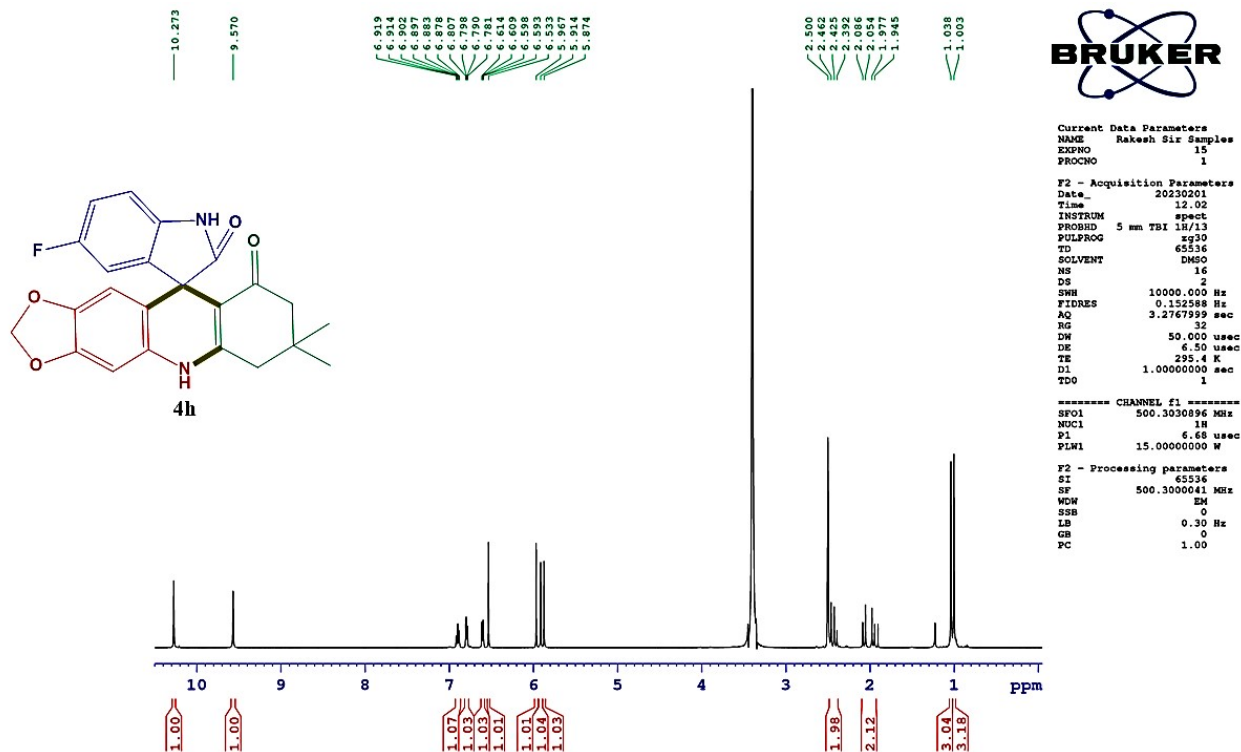

Figure S16: <sup>13</sup>C-NMR (125 MHz, DMSO-d<sub>6</sub>) of Compound 4h.

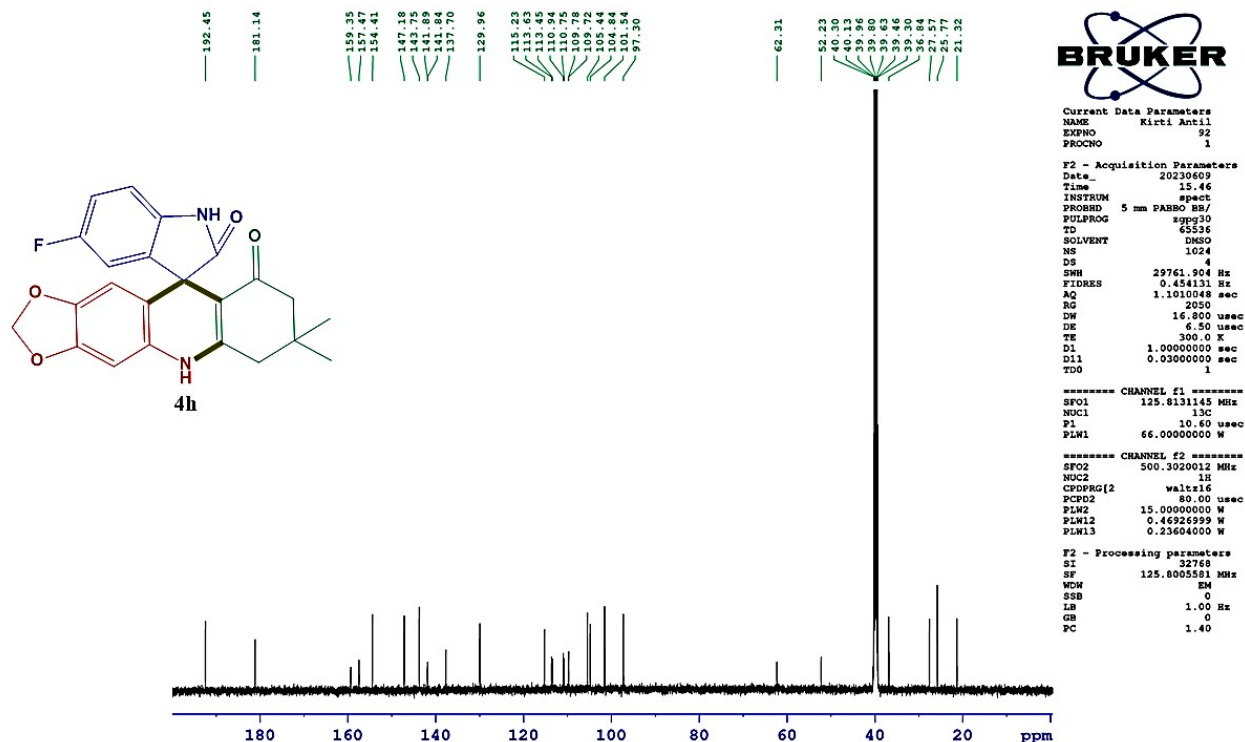

Figure S17: <sup>1</sup>H-NMR (500 MHz, DMSO-d<sub>6</sub>) of Compound 4i.

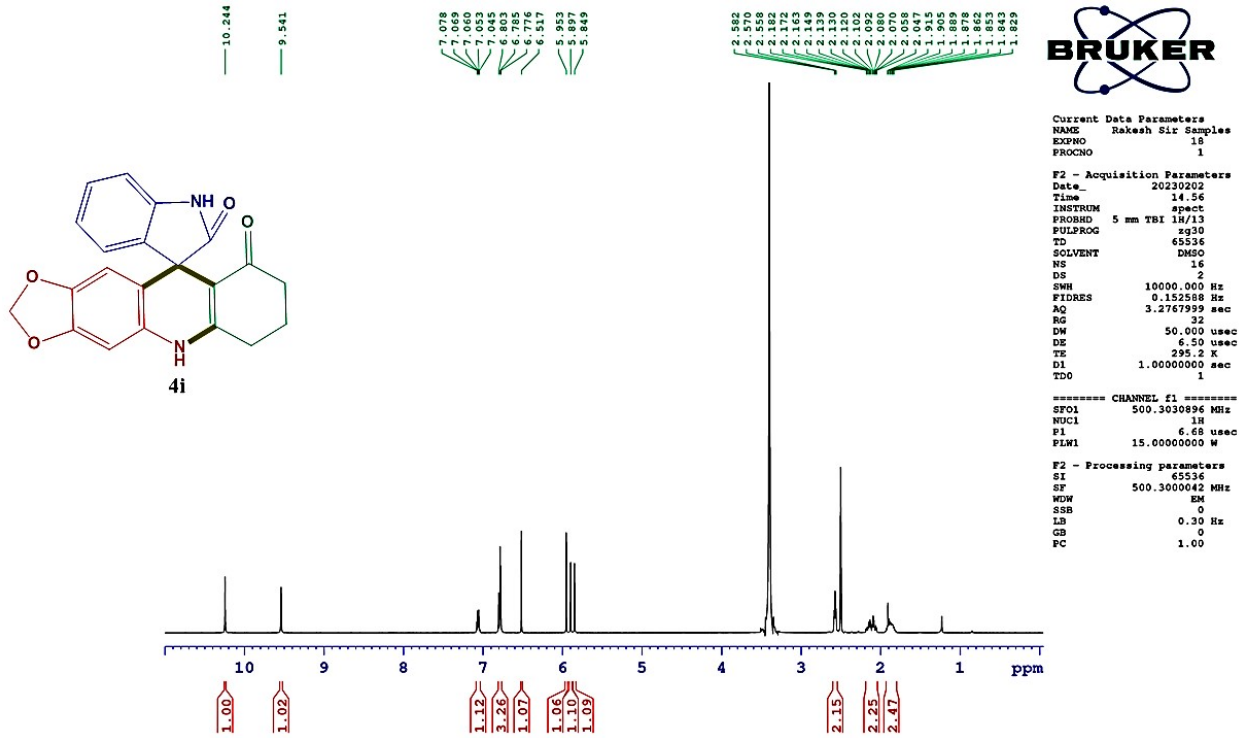

Figure S18: <sup>13</sup>C-NMR (125 MHz, DMSO-d<sub>6</sub>) of Compound 4i.

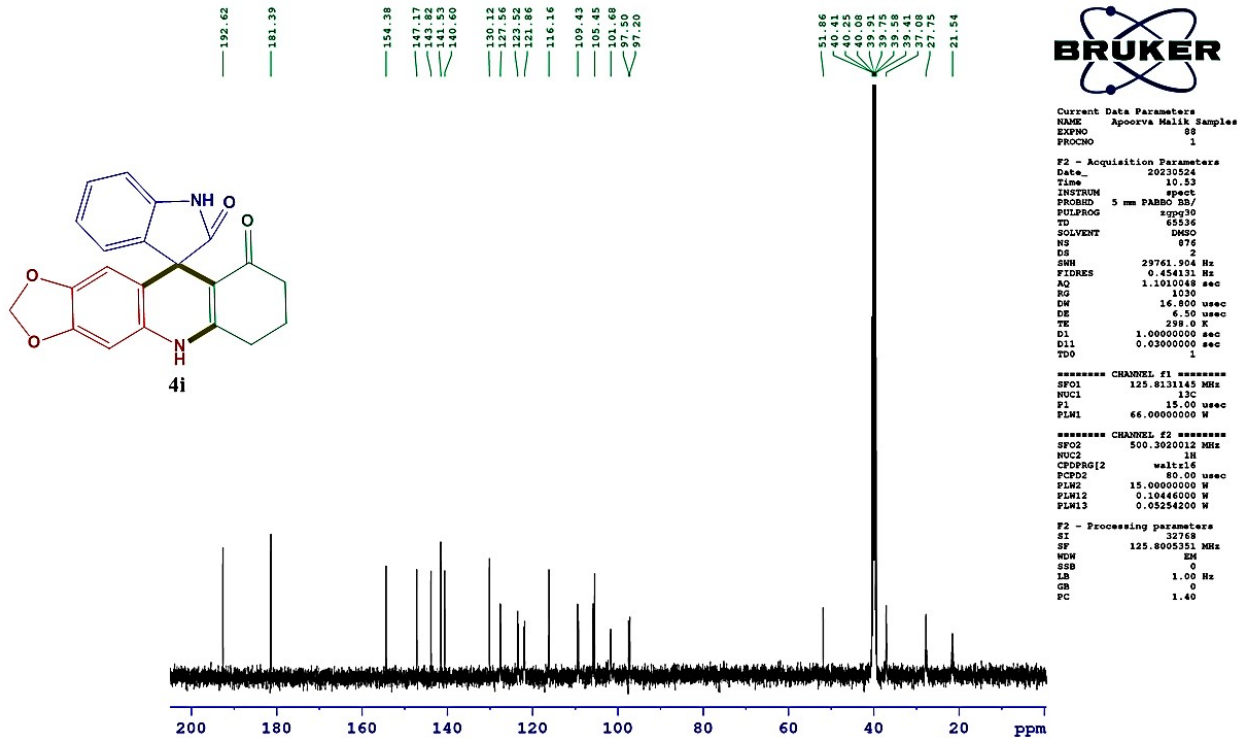

Figure S19:  $^1\text{H-NMR}$  (500 MHz,  $\text{DMSO-d}_6$ ) of Compound 4j.

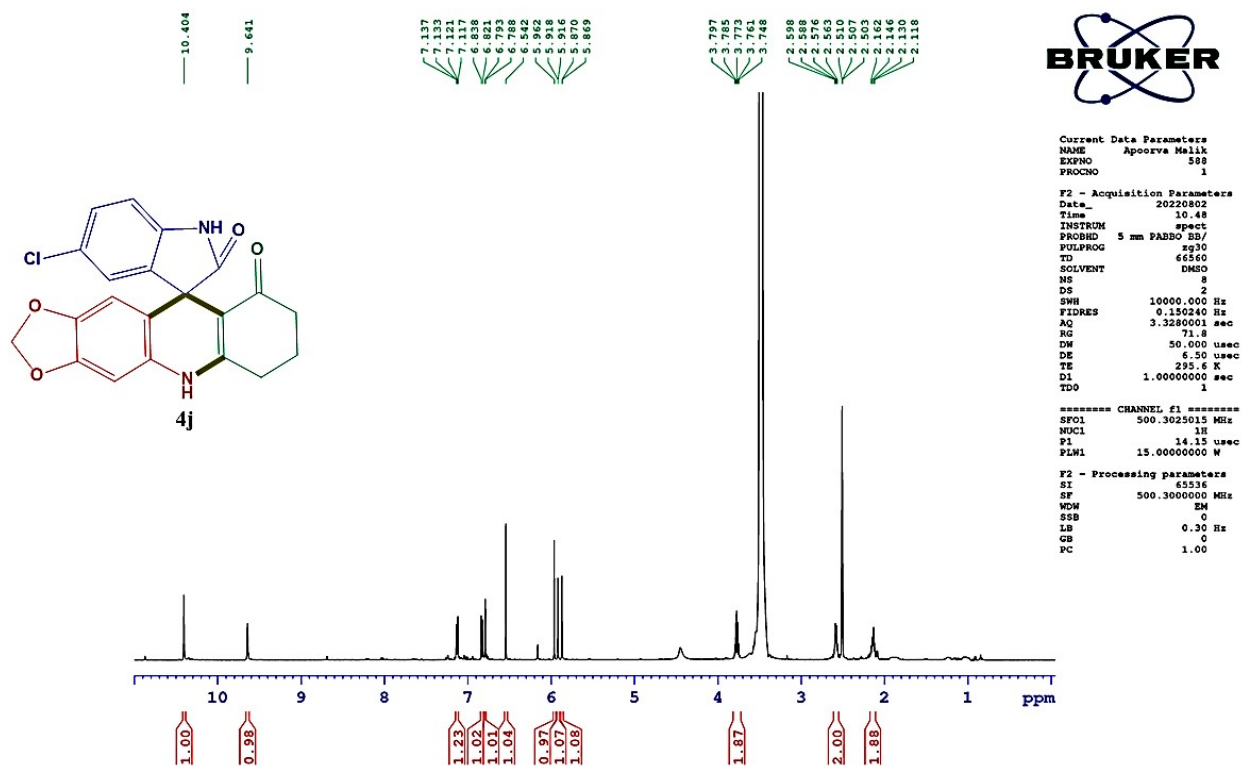

Figure S20:  $^{13}\text{C-NMR}$  (125 MHz,  $\text{DMSO-d}_6$ ) of Compound 4j.

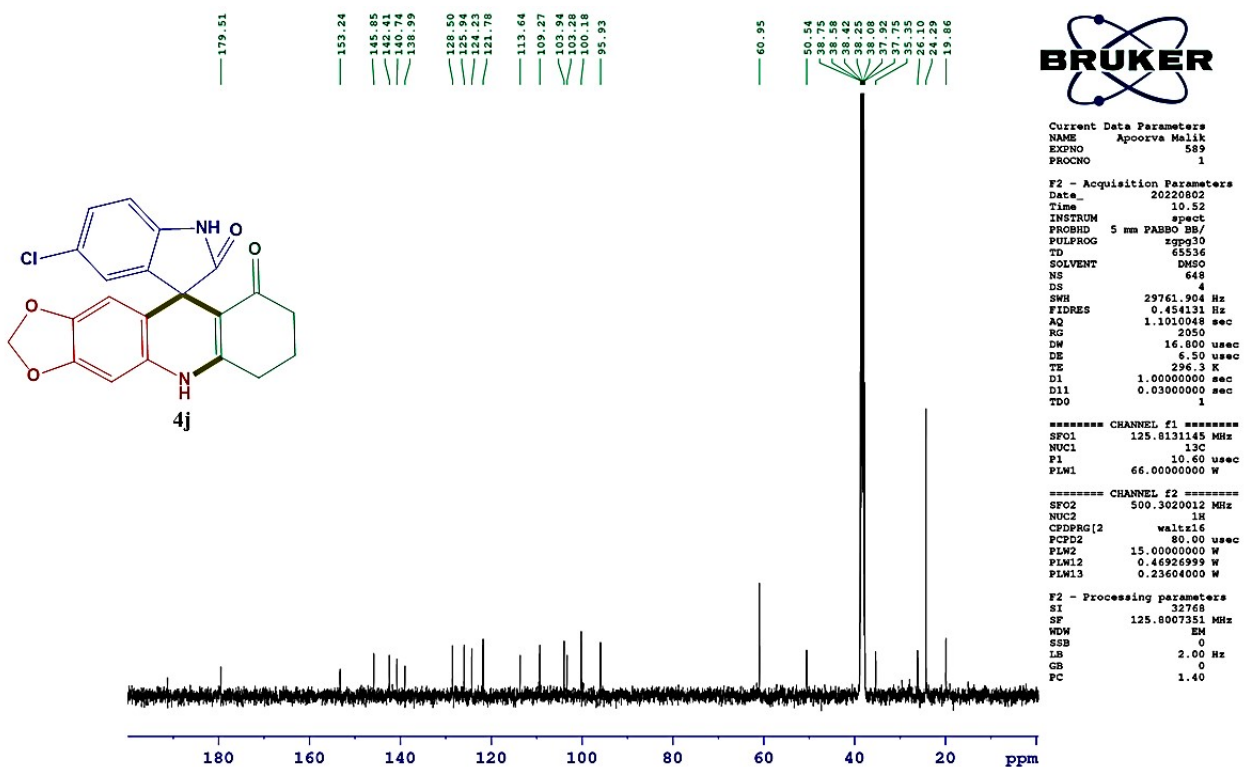

Figure S21: <sup>1</sup>H-NMR (500 MHz, DMSO-d<sub>6</sub>) of Compound 4k.

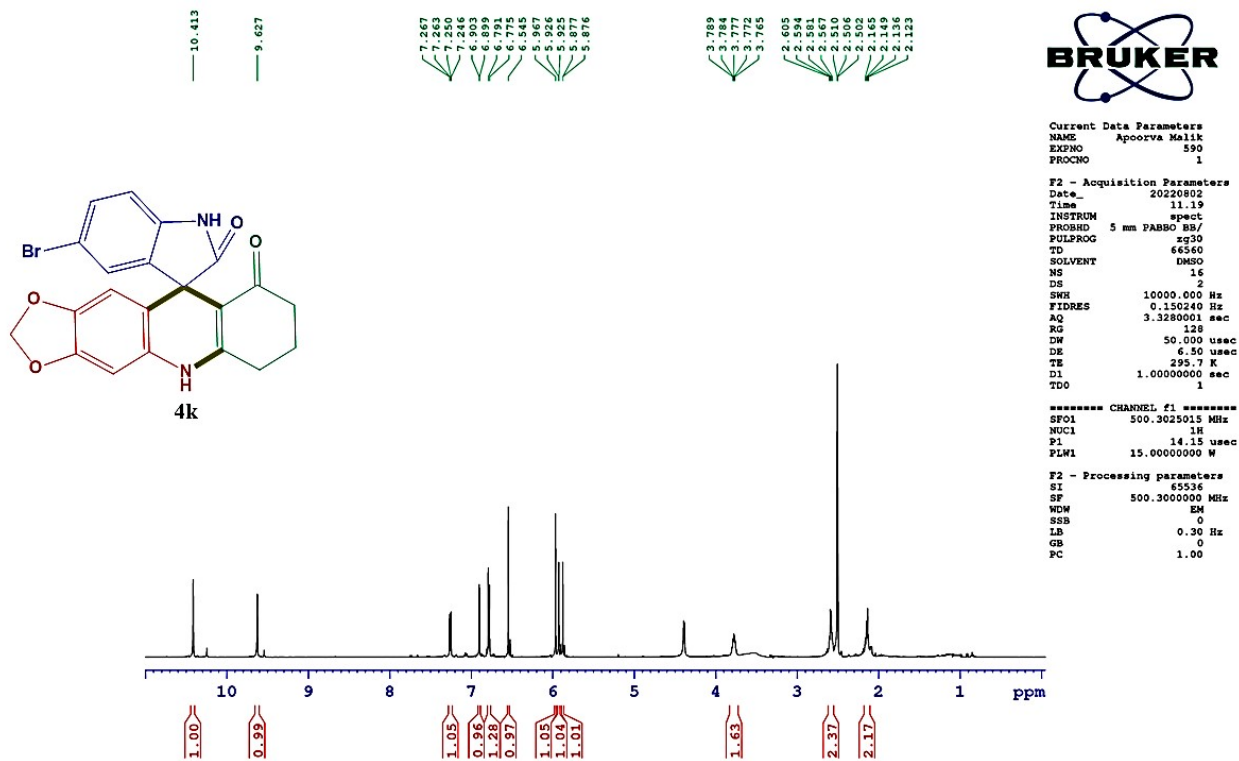

Figure S22: <sup>13</sup>C-NMR (125 MHz, DMSO-d<sub>6</sub>) of Compound 4k.

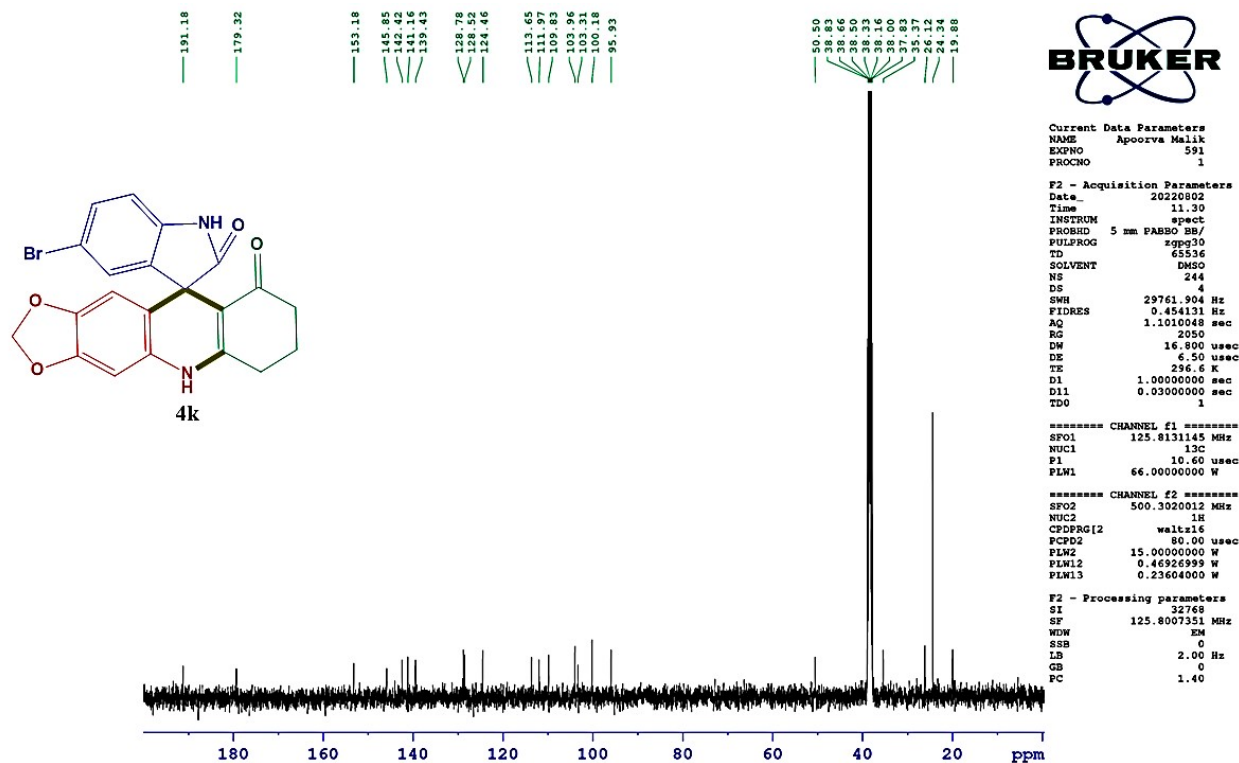

Figure S23:  $^{13}\text{C}$ -NMR (125 MHz,  $\text{DMSO-d}_6$ ) of Compound 4I.

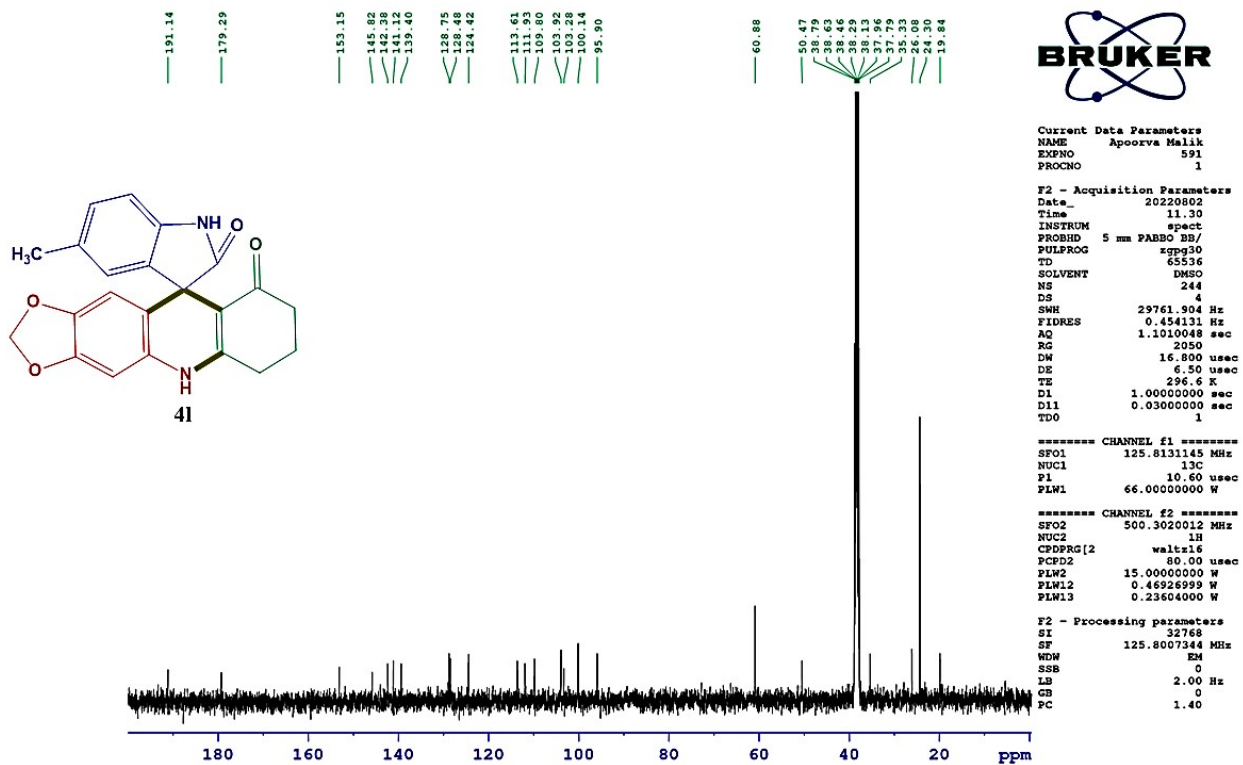

Figure S24: <sup>1</sup>H-NMR (500 MHz, DMSO-d<sub>6</sub>) of Compound 4m.

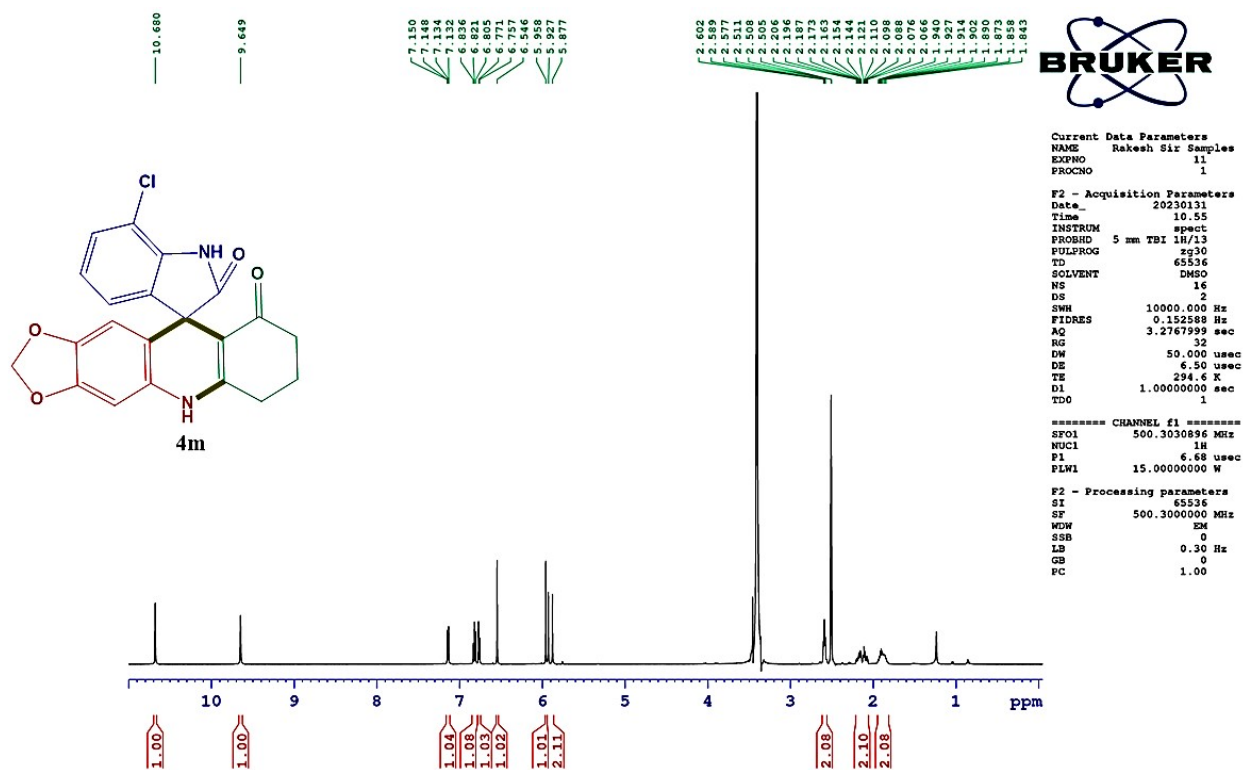

Figure S25: <sup>13</sup>C-NMR (125 MHz, DMSO-d<sub>6</sub>) of Compound 4m.

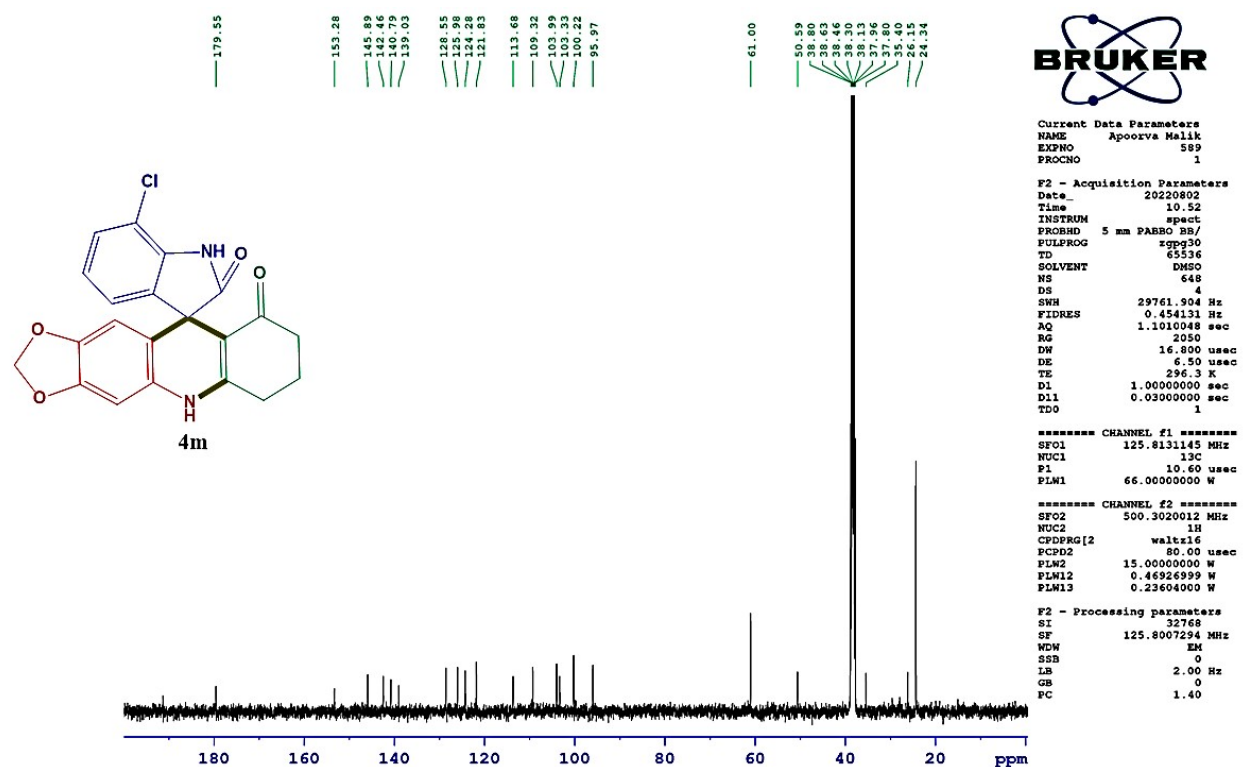



Figure S26: <sup>1</sup>H-NMR (500 MHz, DMSO-d<sub>6</sub>) of Compound 4n.

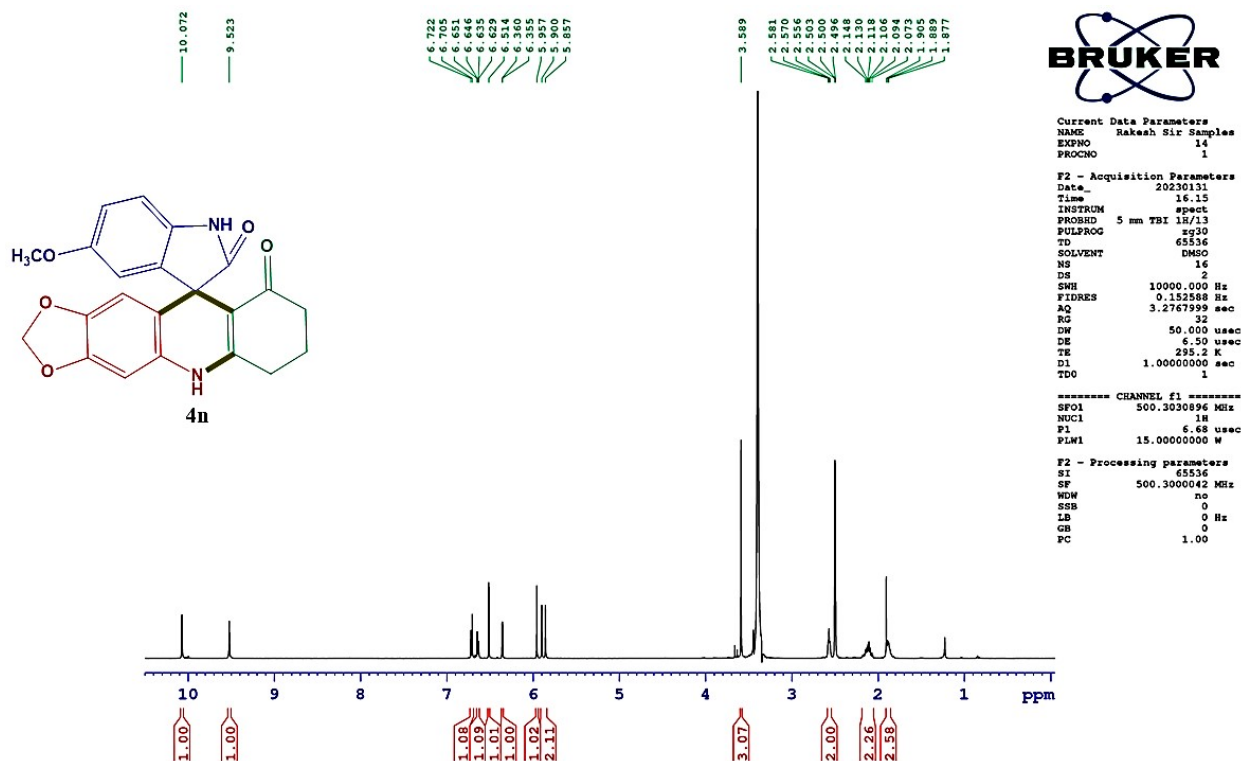

Figure S27: <sup>13</sup>C-NMR (125 MHz, DMSO-d<sub>6</sub>) of Compound 4n.

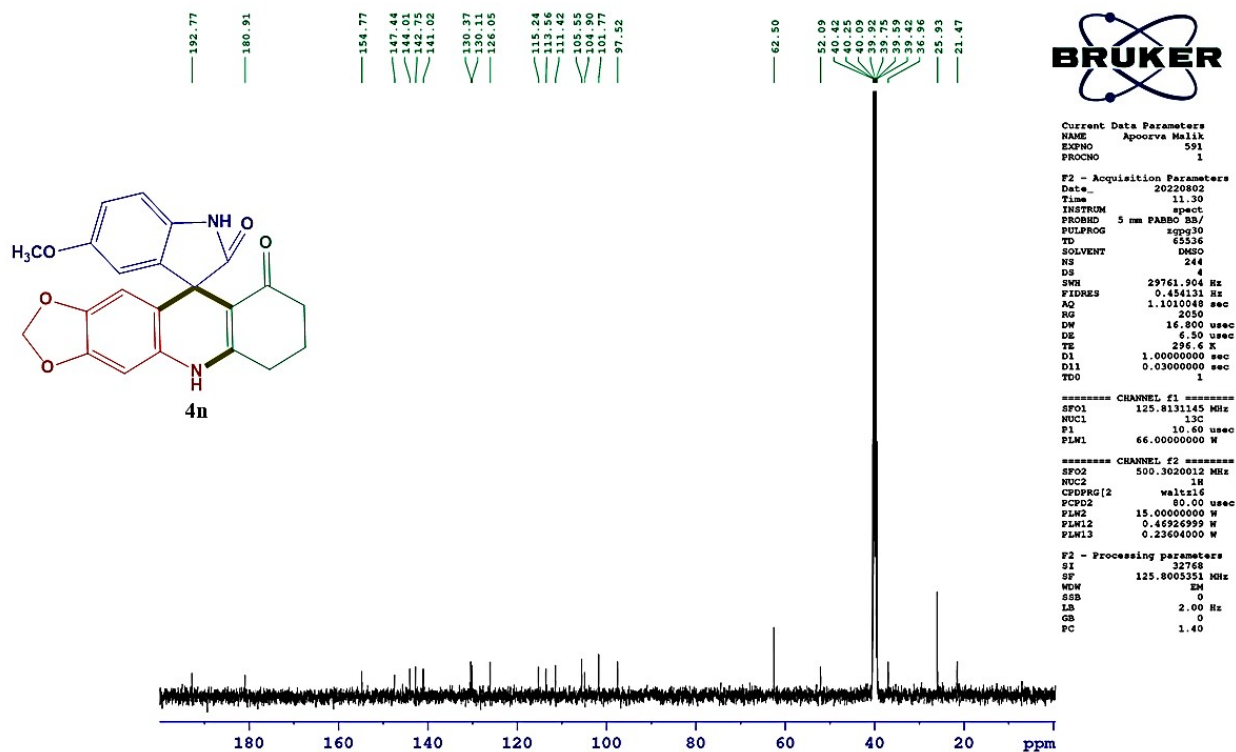

Figure S28: <sup>1</sup>H-NMR (500 MHz, DMSO-d<sub>6</sub>) of Compound 4o.

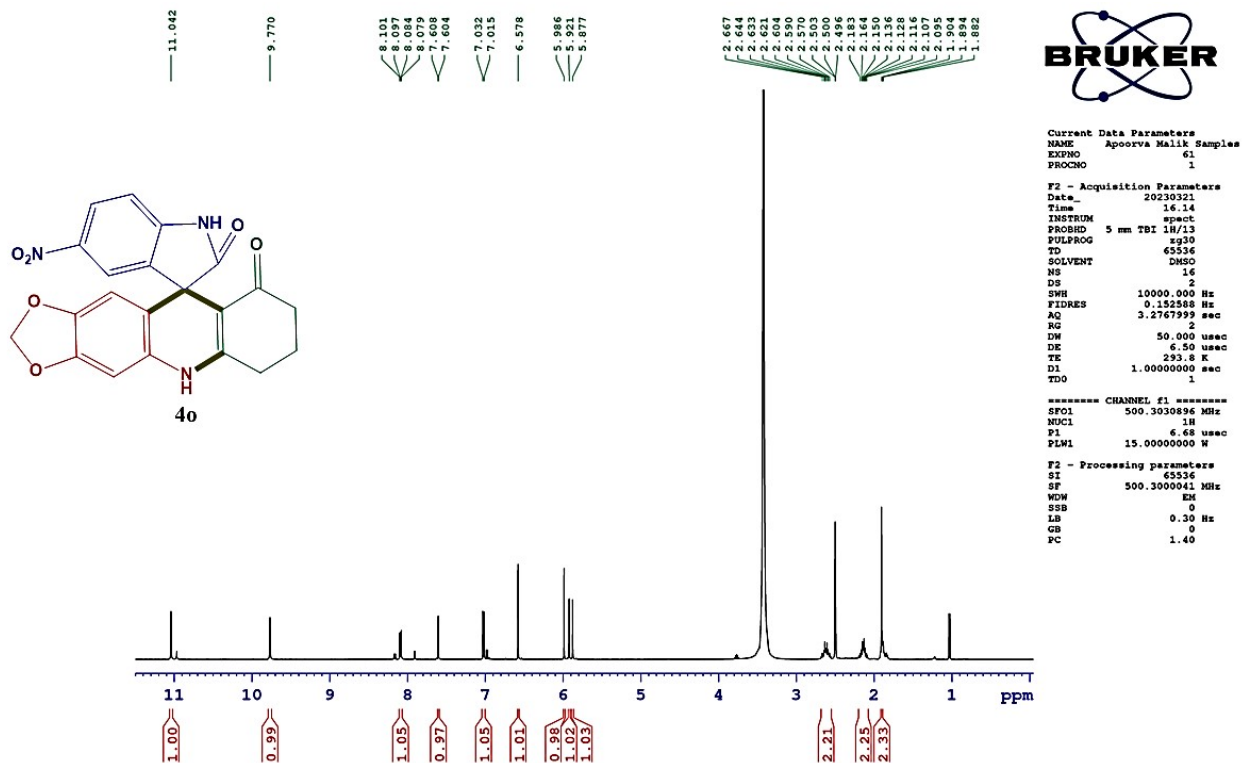

Figure S39: <sup>13</sup>C-NMR (125 MHz, DMSO-d<sub>6</sub>) of Compound 4o.

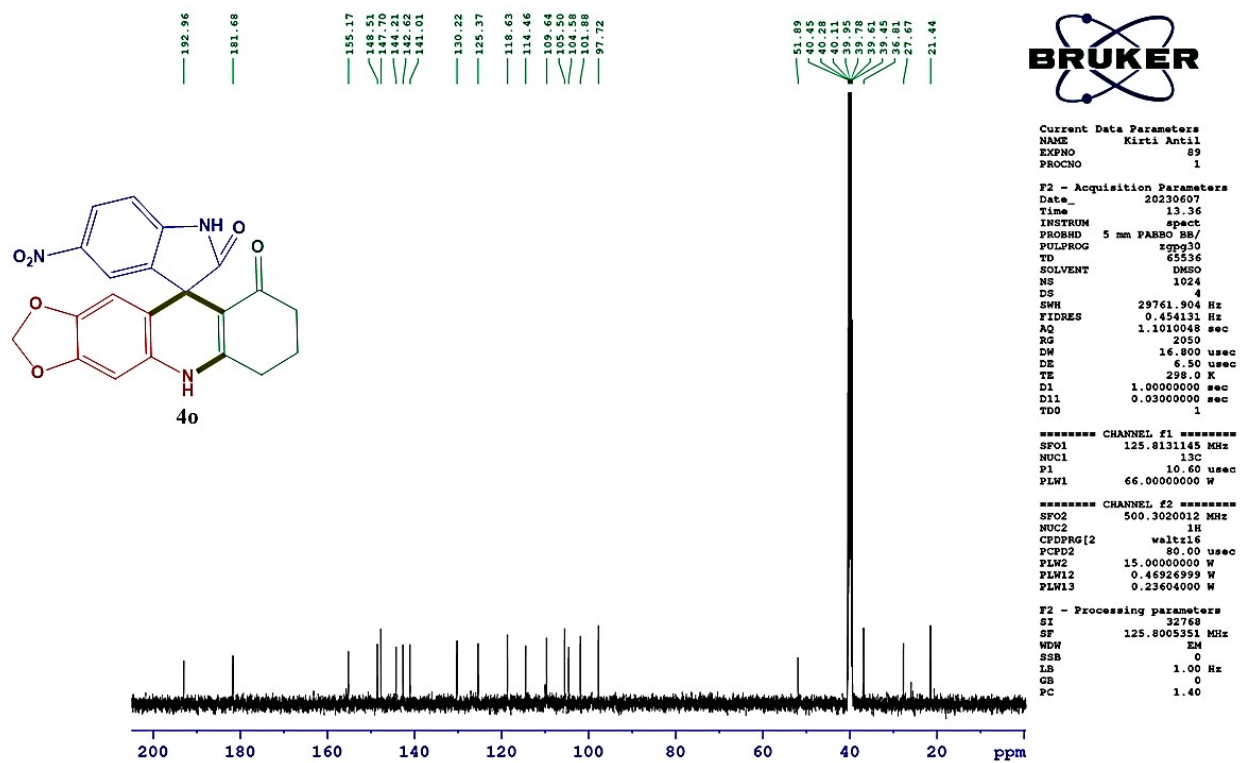

Figure S30:  $^1\text{H-NMR}$  (500 MHz,  $\text{DMSO-d}_6$ ) of Compound 4p.

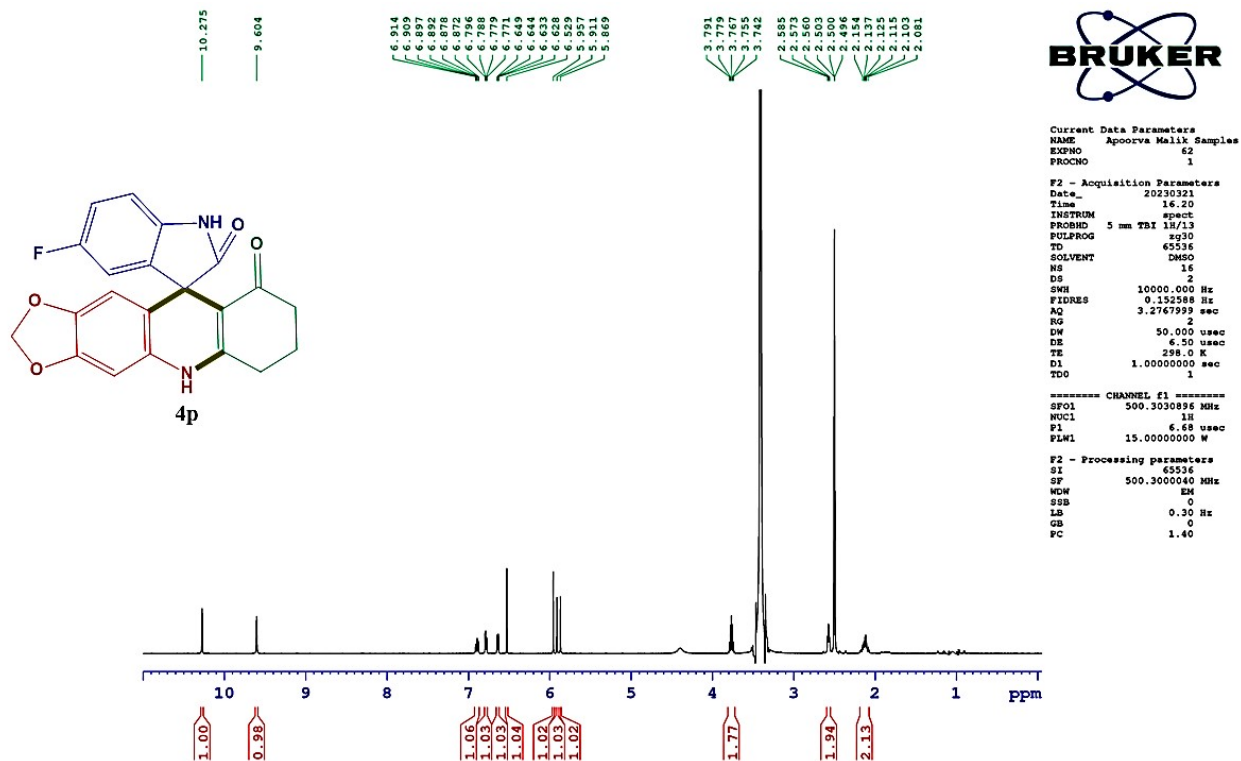

Figure S31:  $^{13}\text{C-NMR}$  (125 MHz,  $\text{DMSO-d}_6$ ) of Compound 4p.

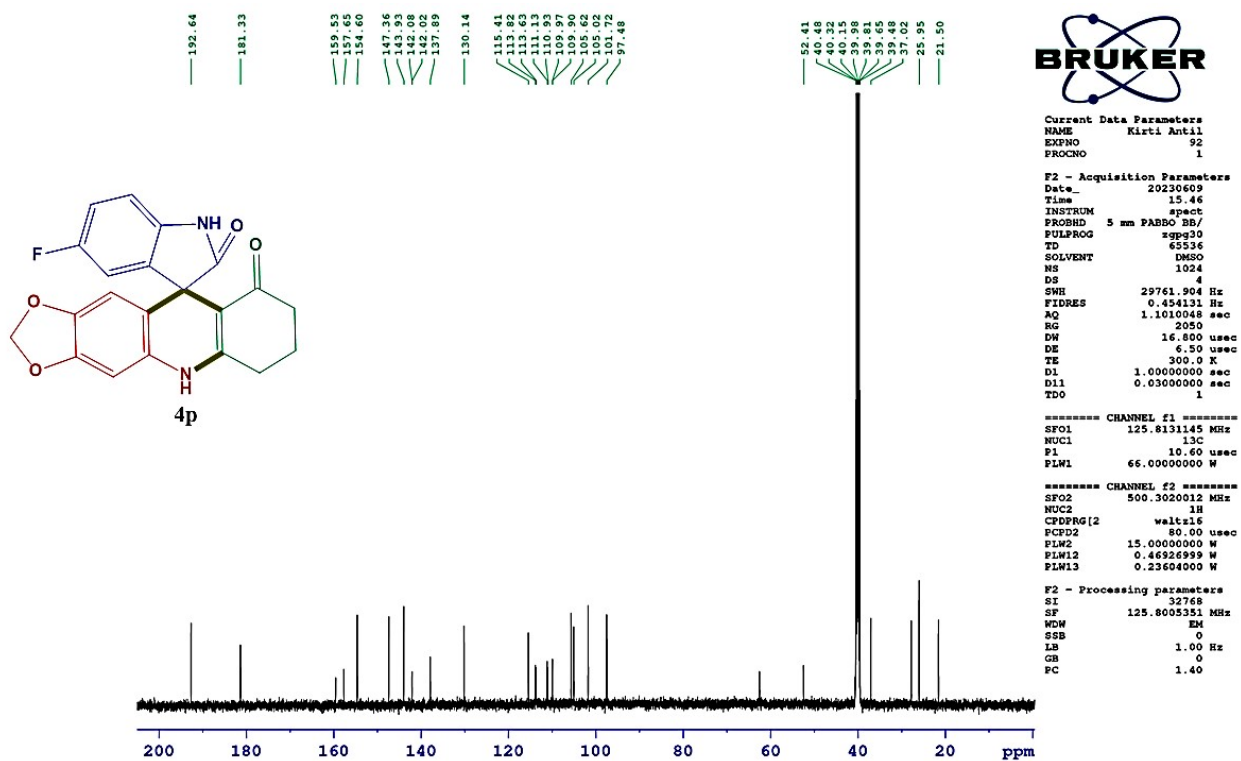

Figure S32: <sup>1</sup>H-NMR (500 MHz, DMSO-d<sub>6</sub>) of Compound 4q.

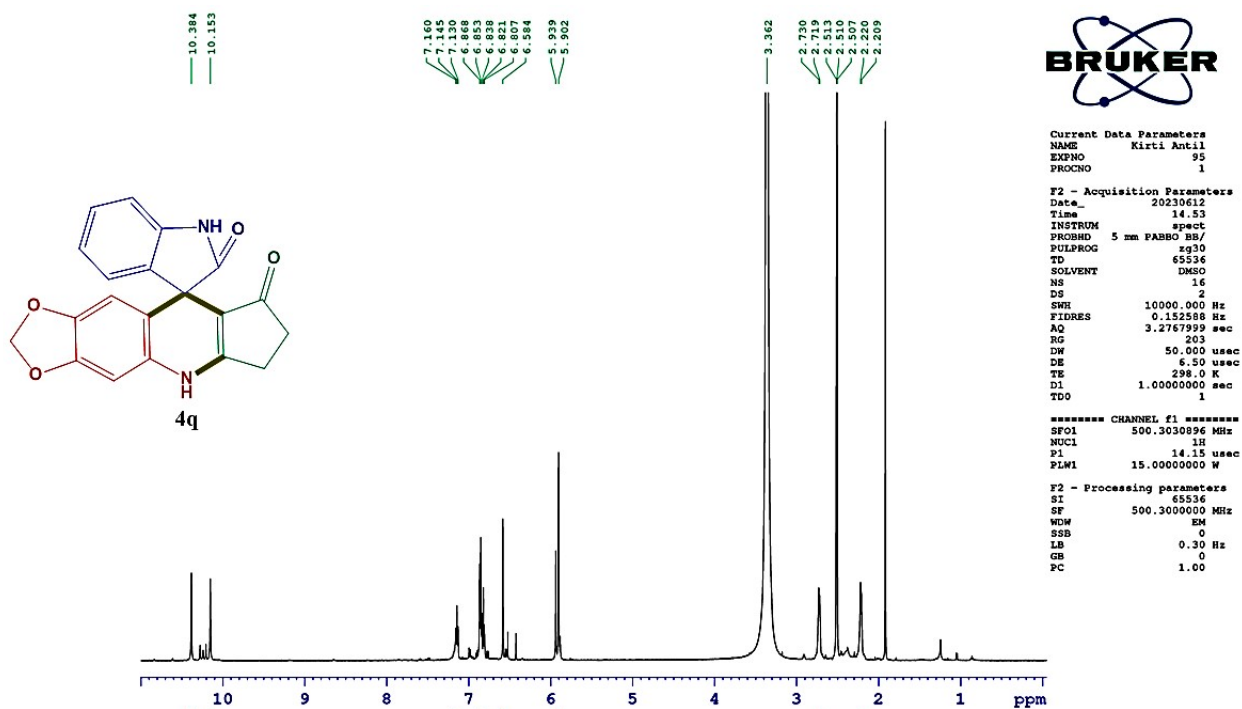

Figure S33: <sup>13</sup>C-NMR (125 MHz, DMSO-d<sub>6</sub>) of Compound 4q.

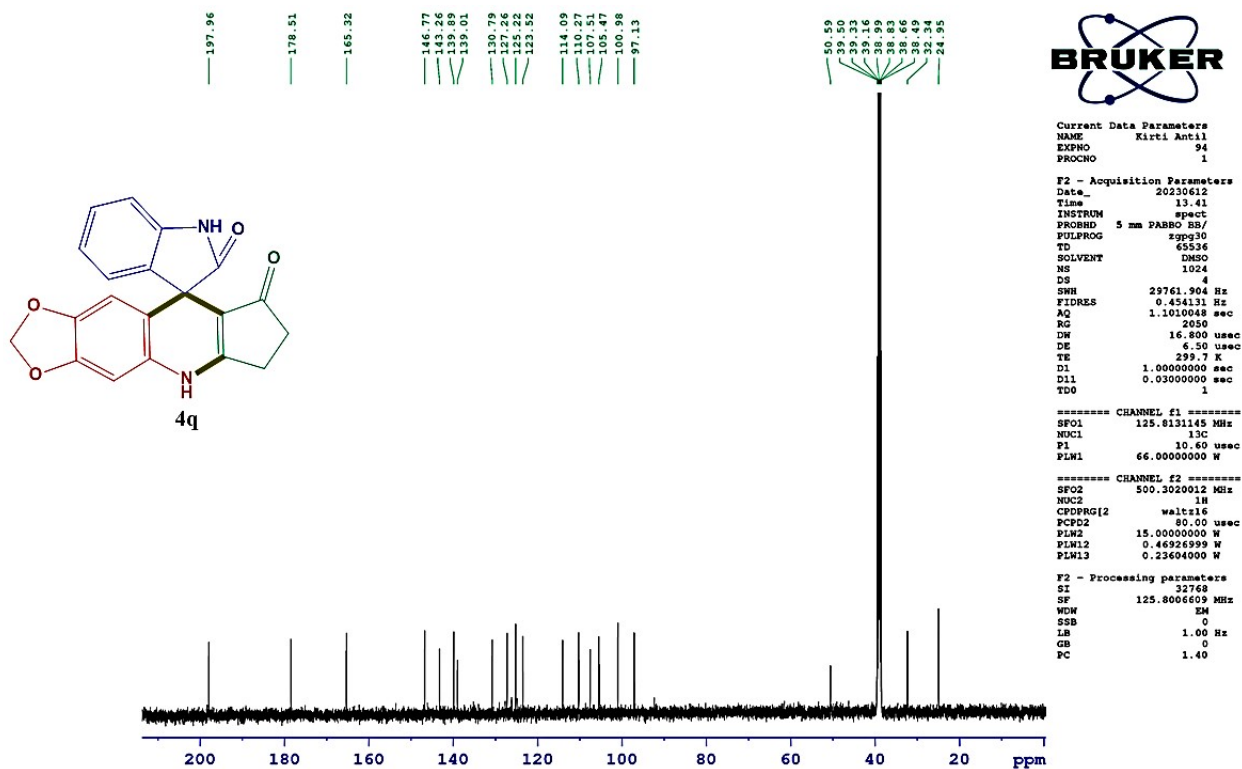

Figure S34:  $^1\text{H-NMR}$  (500 MHz,  $\text{DMSO-d}_6$ ) of Compound 4r.

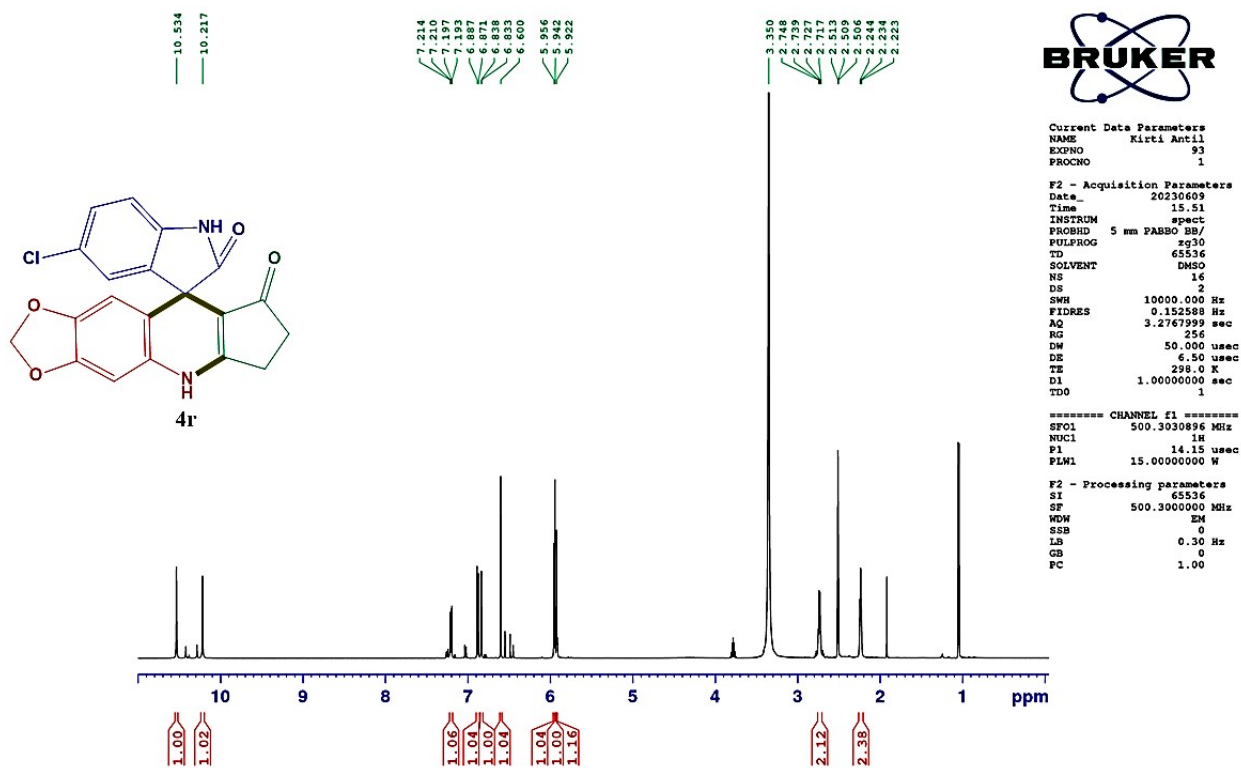

Figure S35:  $^{13}\text{C-NMR}$  (125 MHz,  $\text{DMSO-d}_6$ ) of Compound 4r.

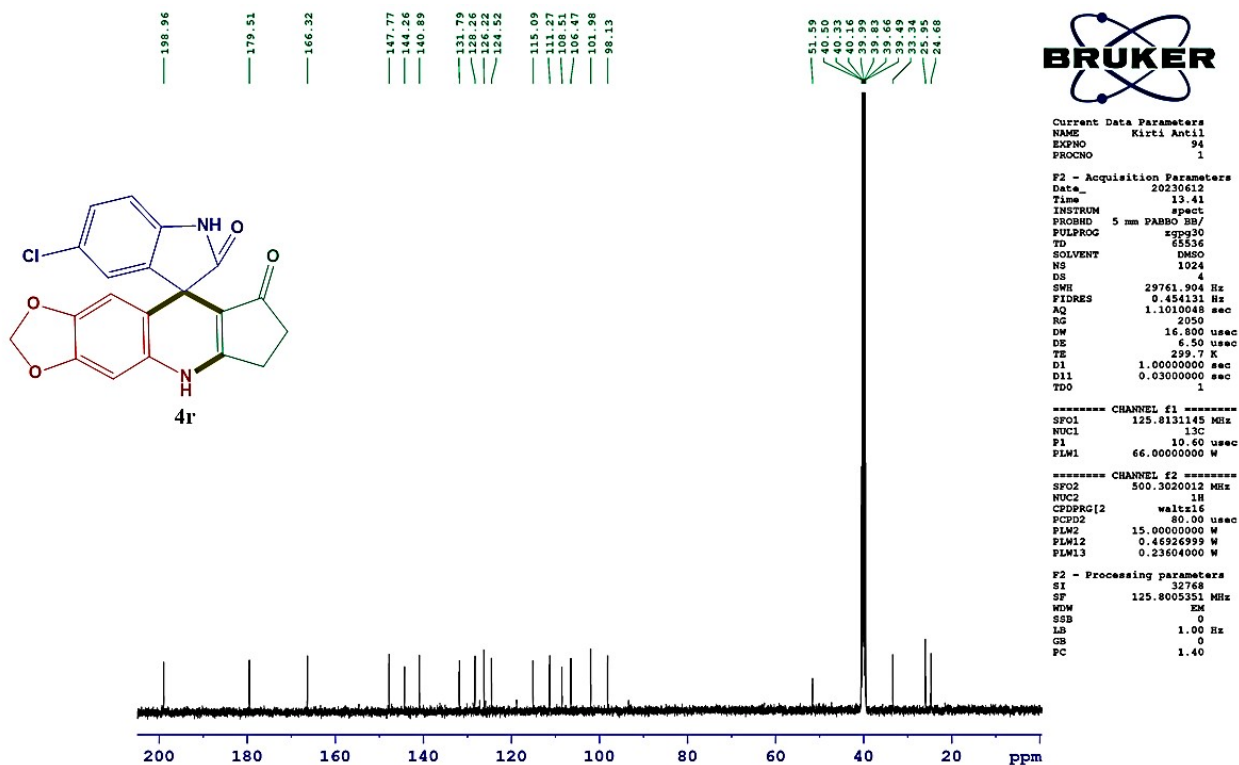



Figure S36: <sup>1</sup>H-NMR (500 MHz, DMSO-d<sub>6</sub>) of Compound 4s.

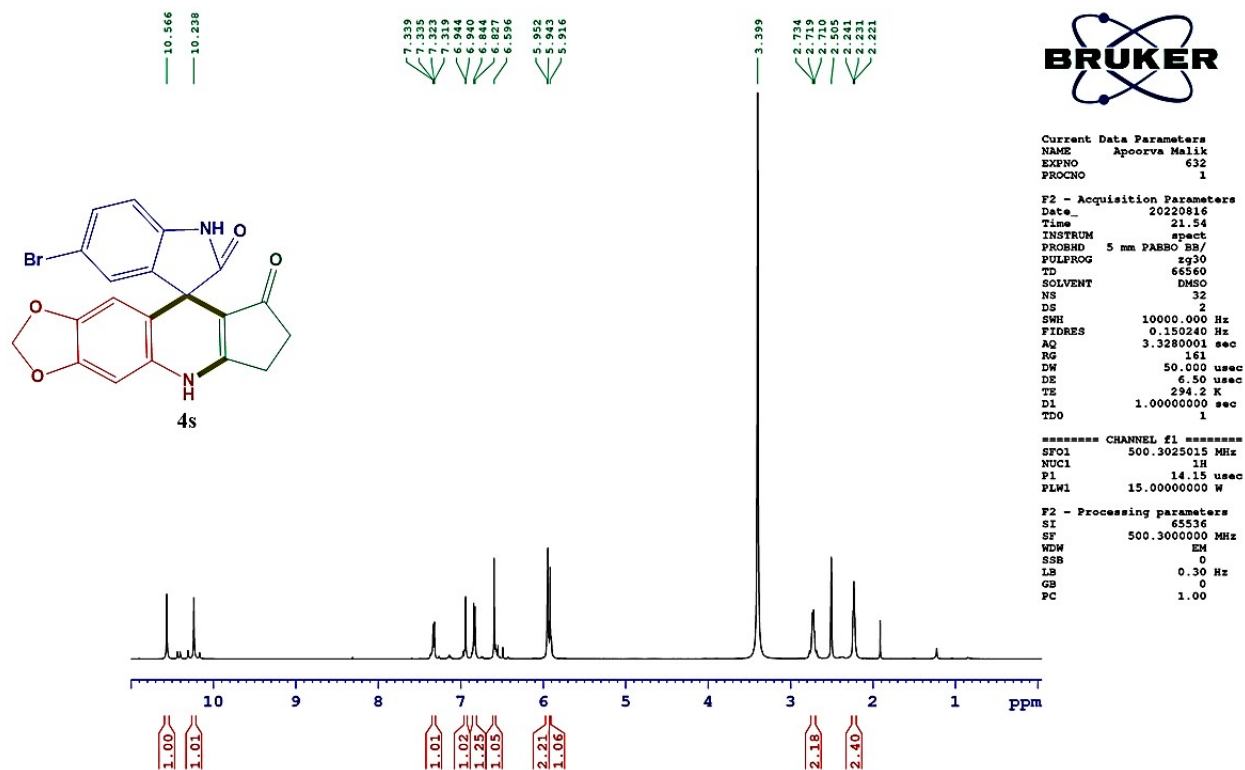

Figure S37: <sup>13</sup>C-NMR (125 MHz, DMSO-d<sub>6</sub>) of Compound 4s.

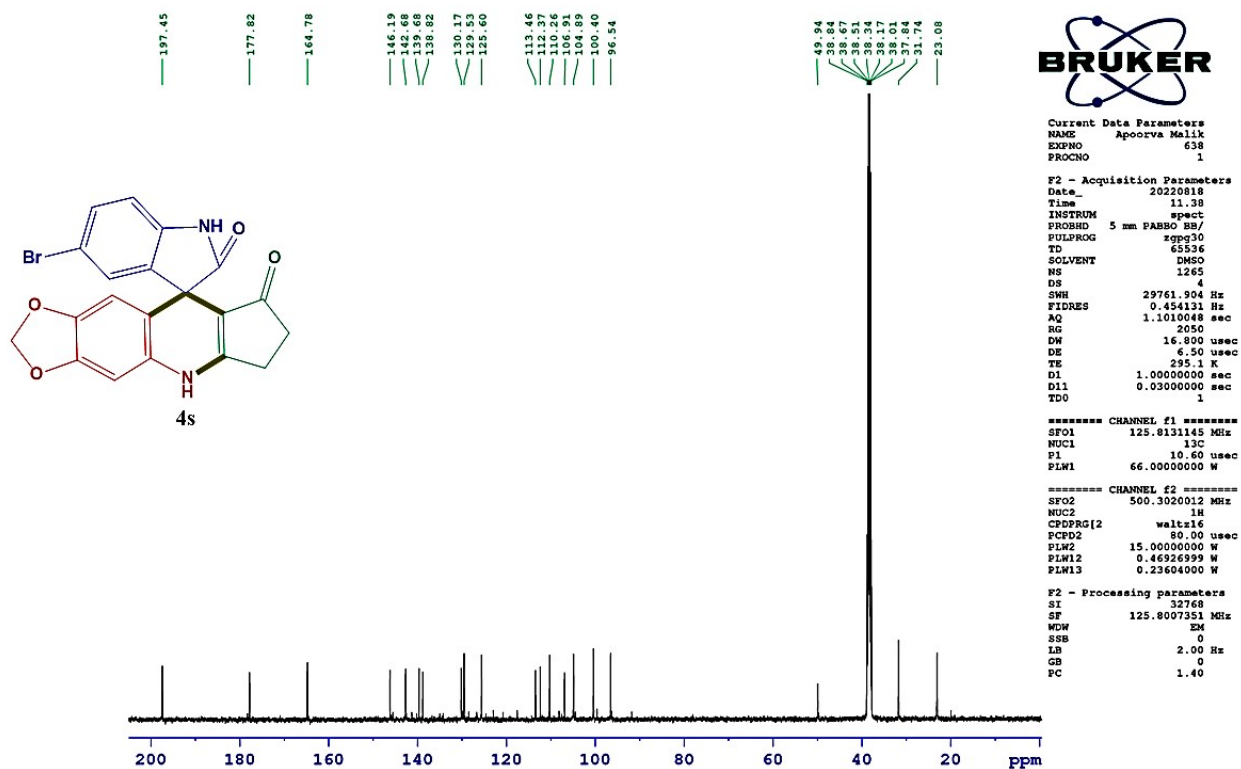



Figure S38: <sup>1</sup>H-NMR (500 MHz, DMSO-d<sub>6</sub>) of Compound 4t.

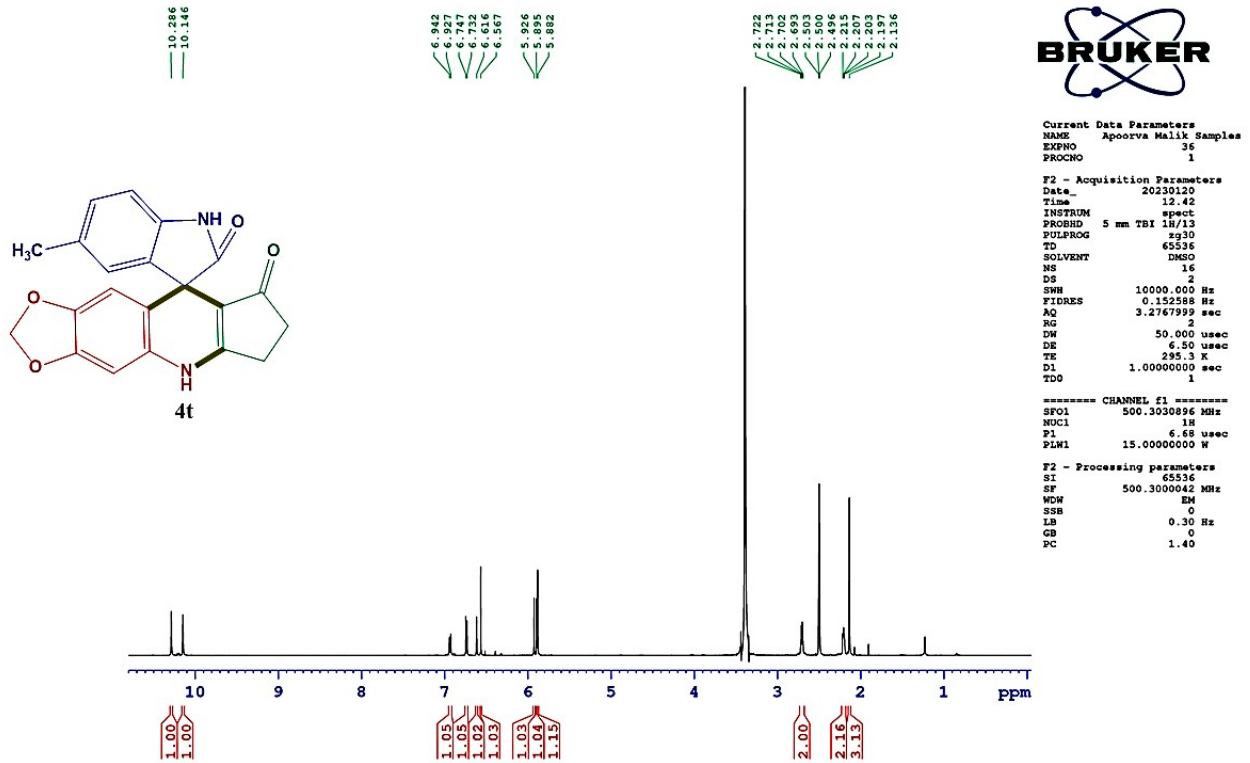

Figure S39: <sup>13</sup>C-NMR (125 MHz, DMSO-d<sub>6</sub>) of Compound 4t.

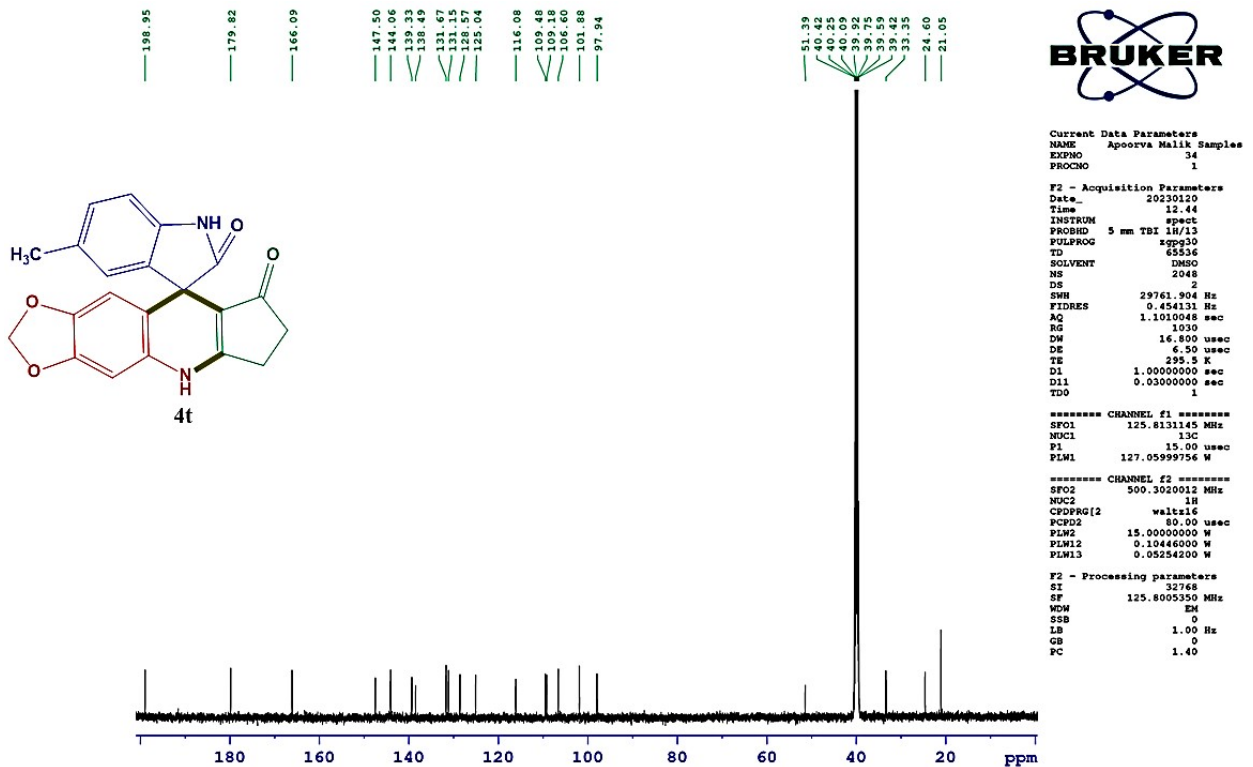

Figure S40:  $^1\text{H-NMR}$  (500 MHz,  $\text{DMSO-d}_6$ ) of Compound 4u.

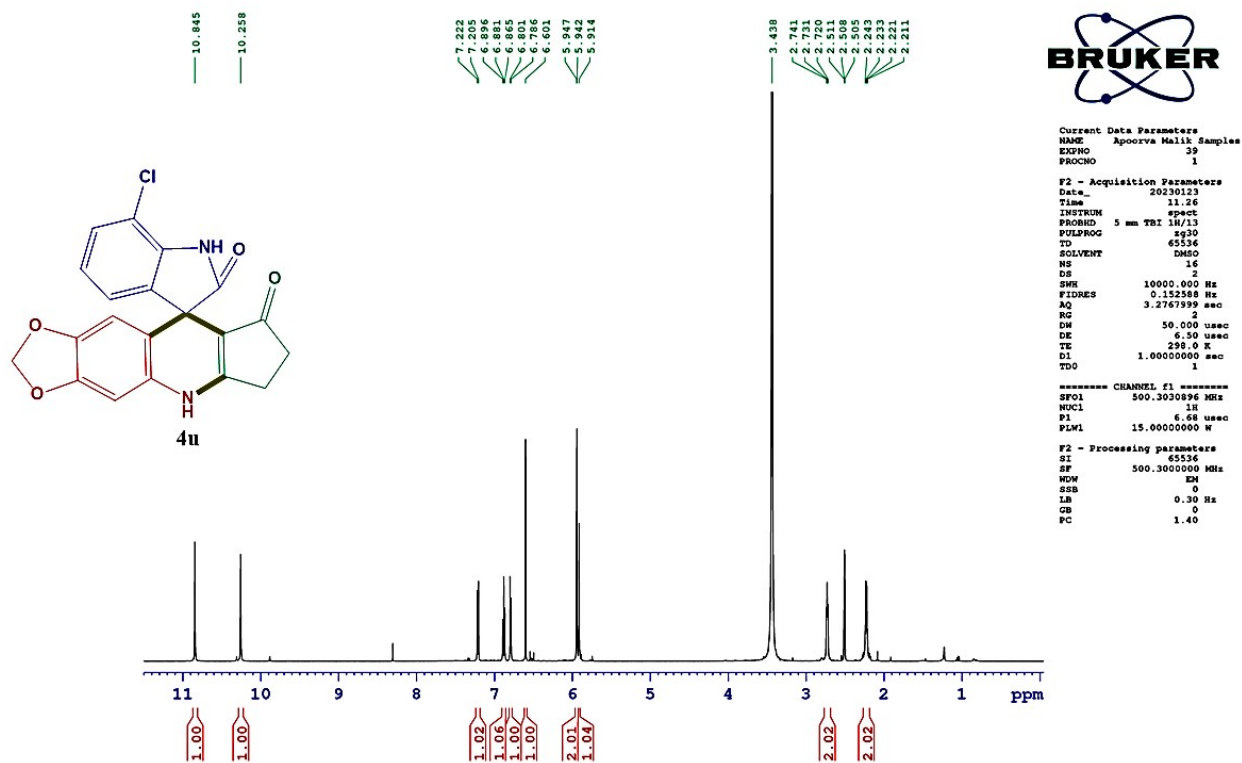

Figure S41:  $^{13}\text{C-NMR}$  (125 MHz,  $\text{DMSO-d}_6$ ) of Compound 4u.

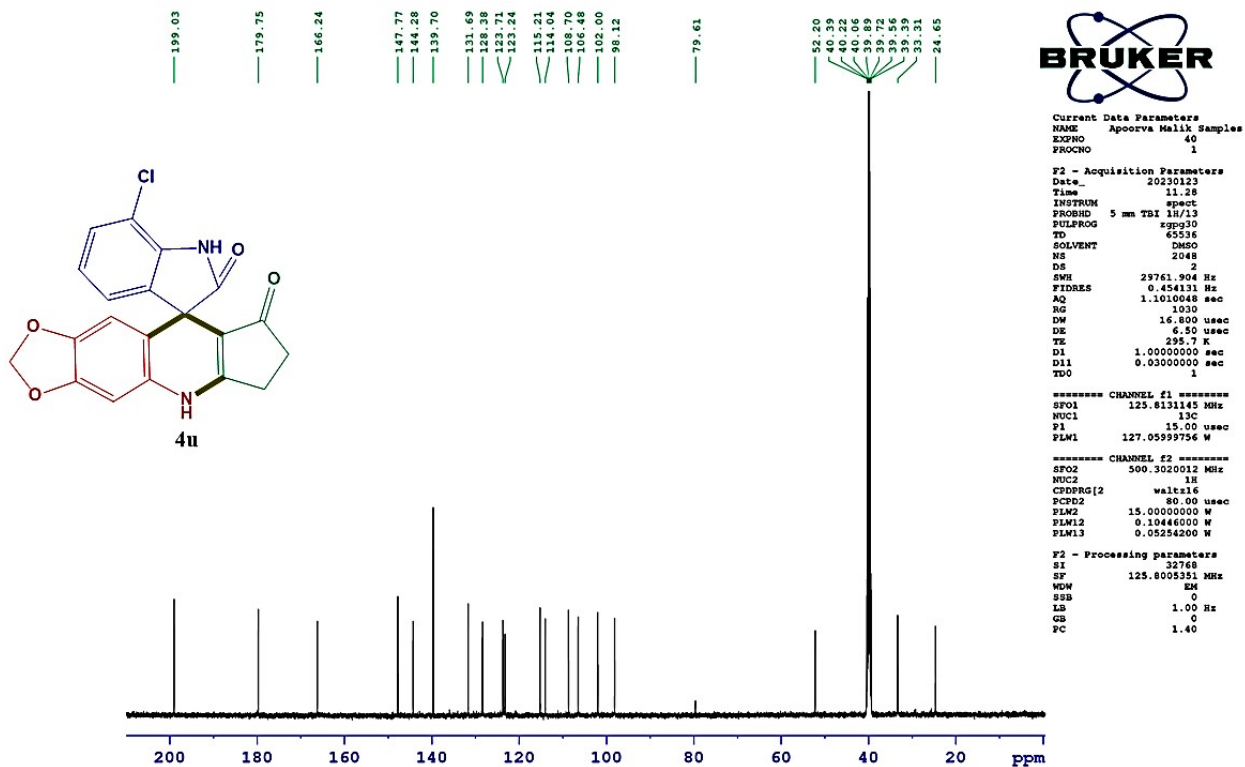

Figure S42: <sup>1</sup>H-NMR (500 MHz, DMSO-d<sub>6</sub>) of Compound 4v.

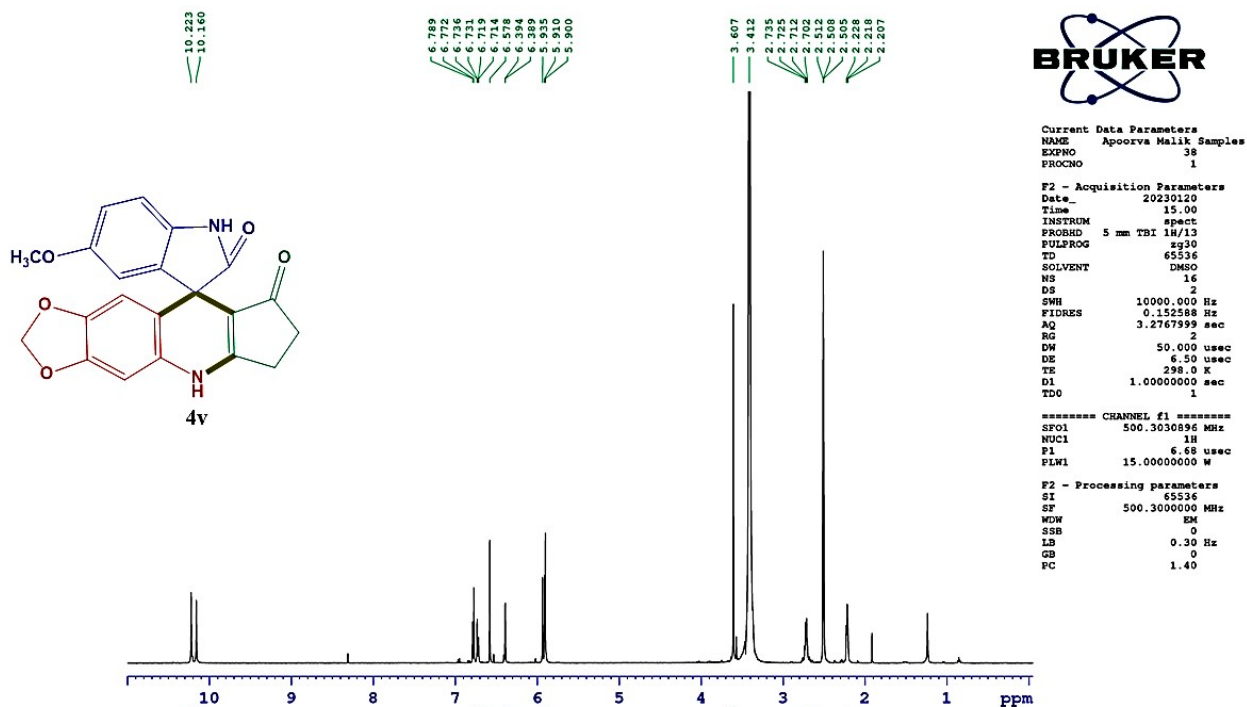

Figure S43: <sup>13</sup>C-NMR (125 MHz, DMSO-d<sub>6</sub>) of Compound 4v.

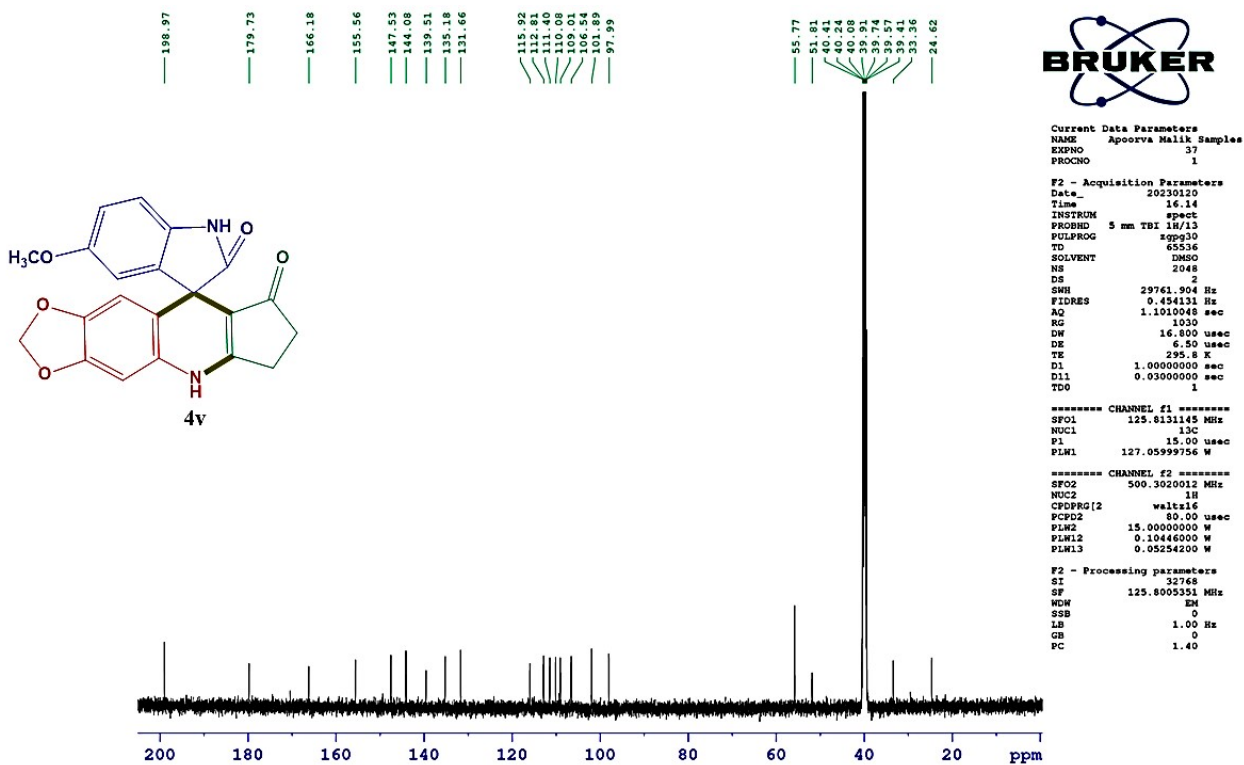

Figure S44: <sup>1</sup>H-NMR (500 MHz, DMSO-d<sub>6</sub>) of Compound 4w.

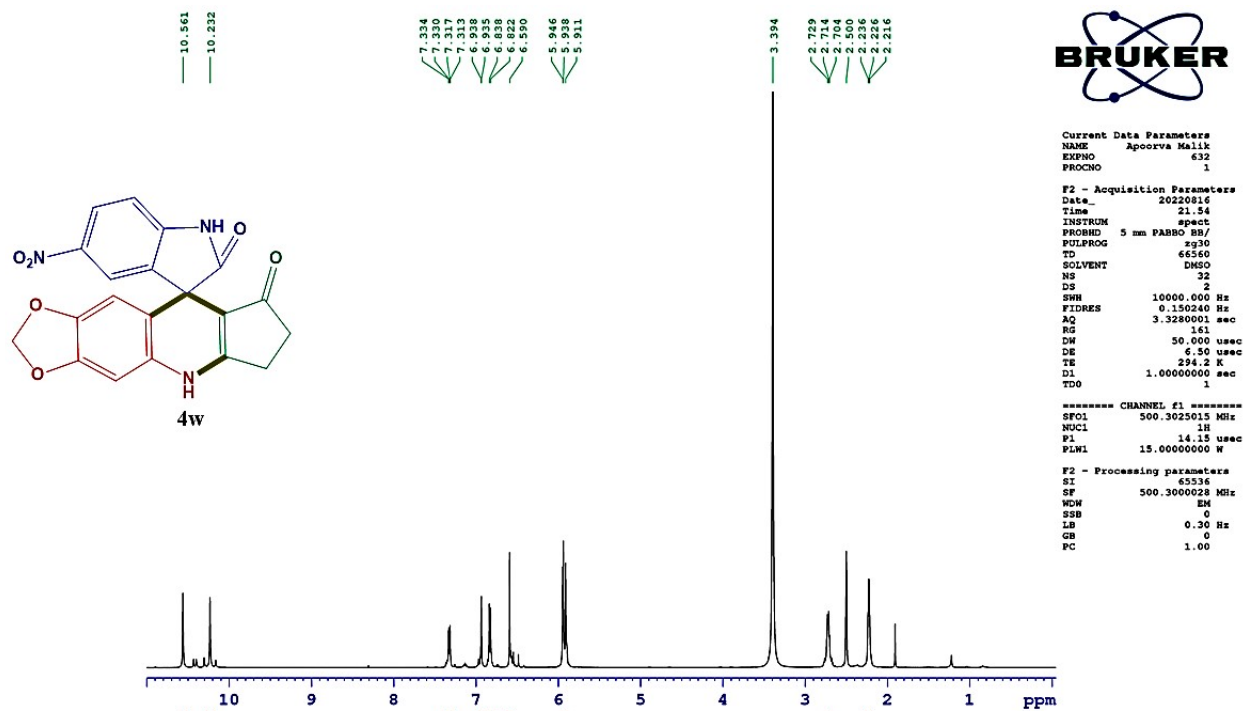

Figure S45: <sup>13</sup>C-NMR (125 MHz, DMSO-d<sub>6</sub>) of Compound 4w.

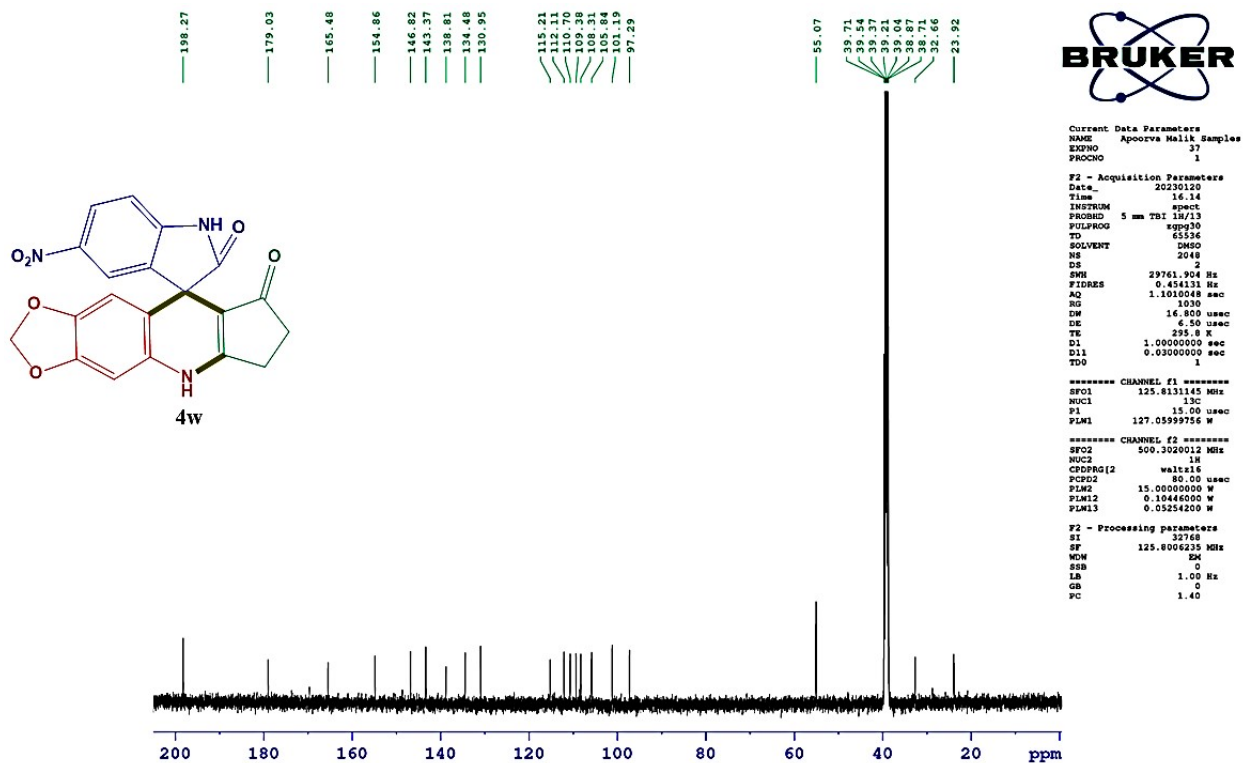

Figure S46: <sup>1</sup>H-NMR (500 MHz, DMSO-d<sub>6</sub>) of Compound 4x.

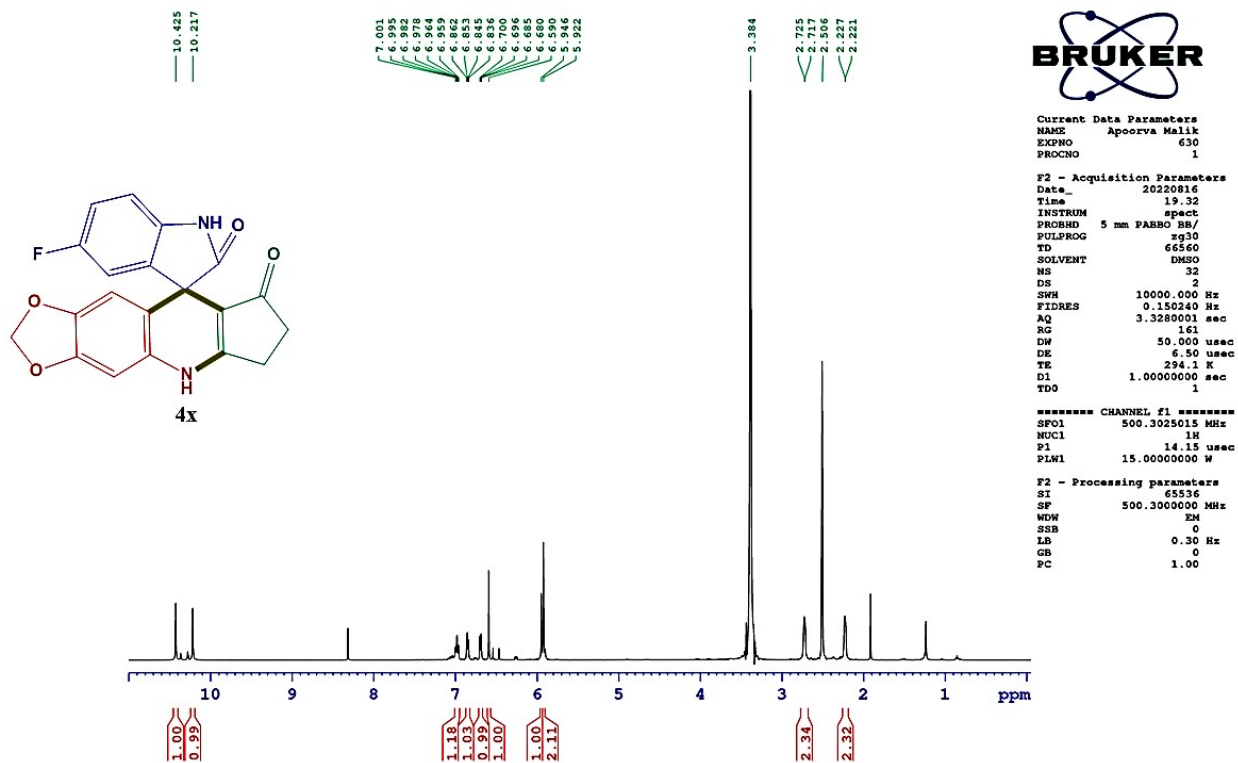

Figure S47: <sup>13</sup>C-NMR (125 MHz, DMSO-d<sub>6</sub>) of Compound 4x.

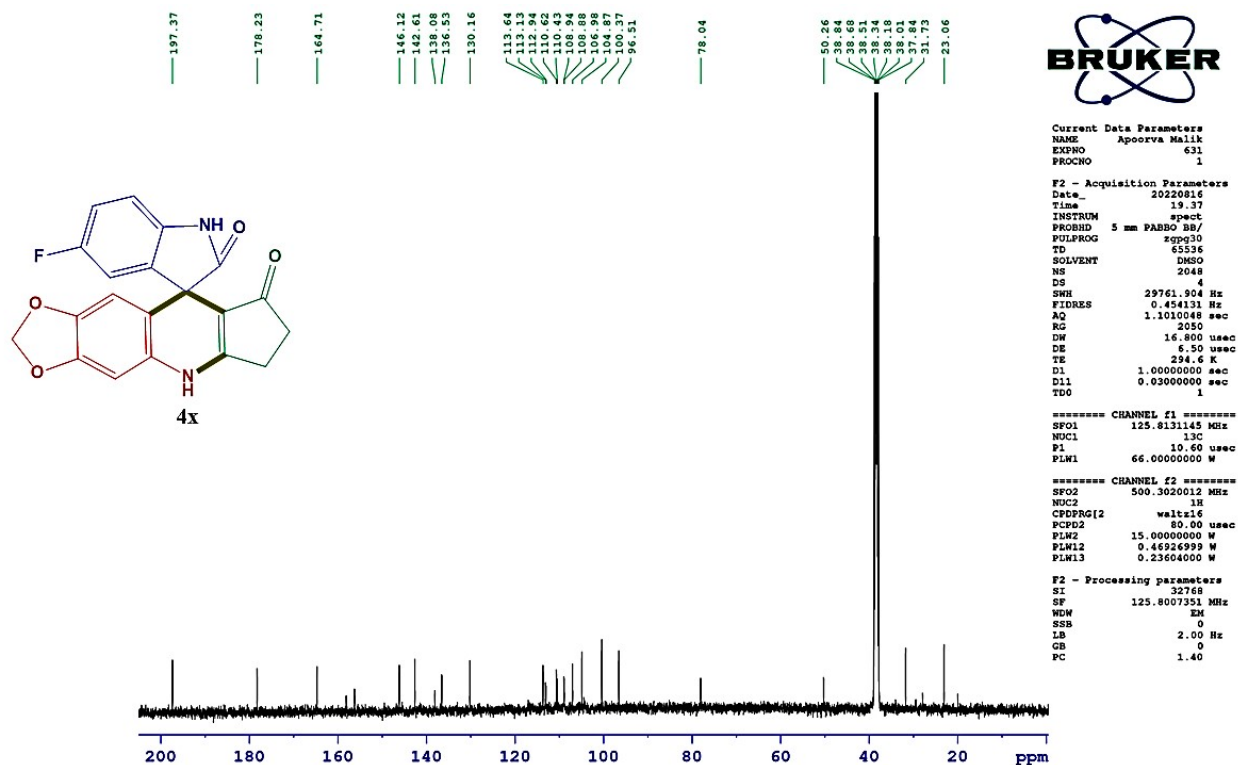

Figure S48: HRMS of Compound 4a.

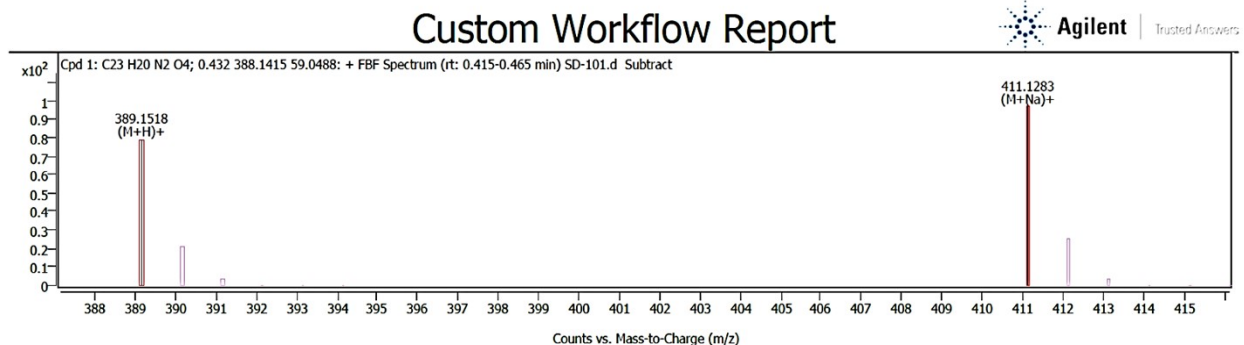

Figure S49: HRMS of Compound 4b.

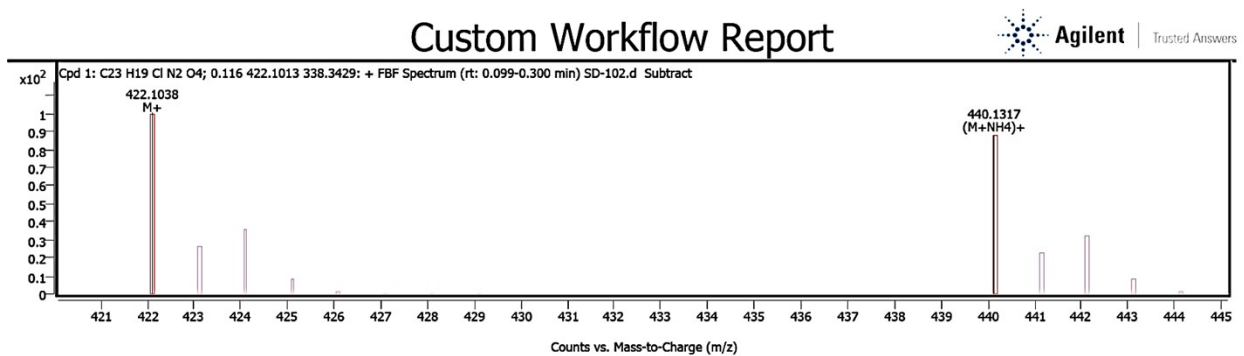

Figure S50: HRMS of Compound 4c.

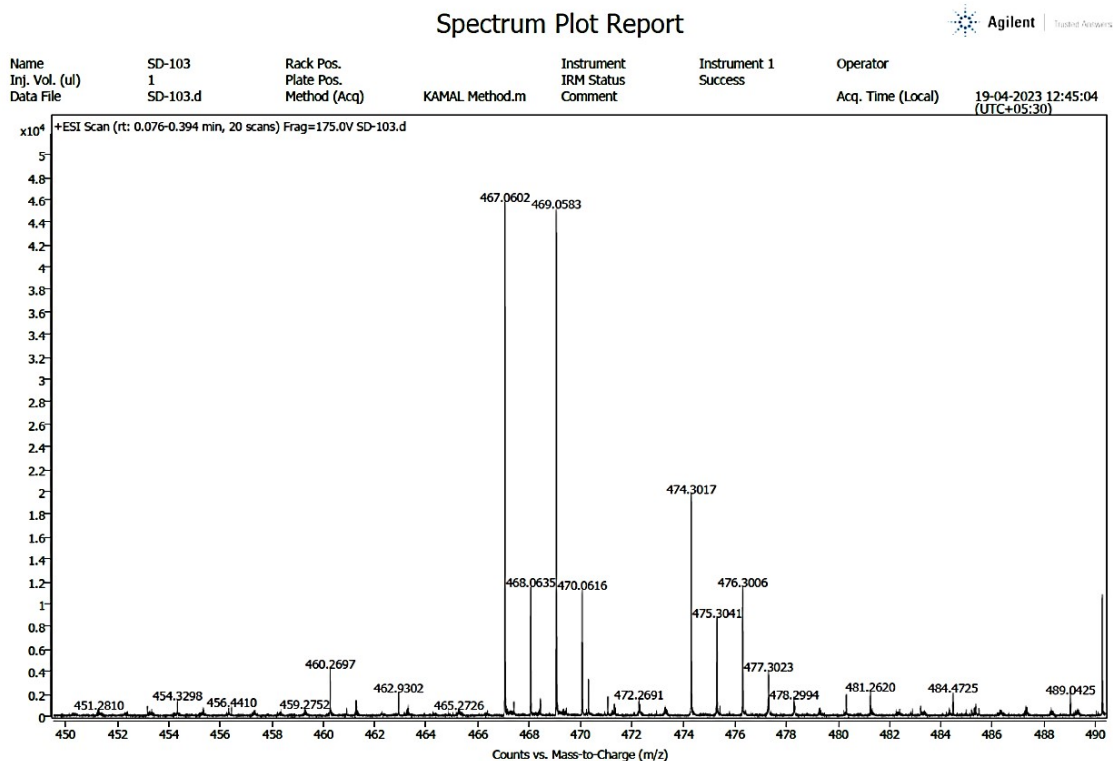



Figure S51: HRMS of Compound 4d.

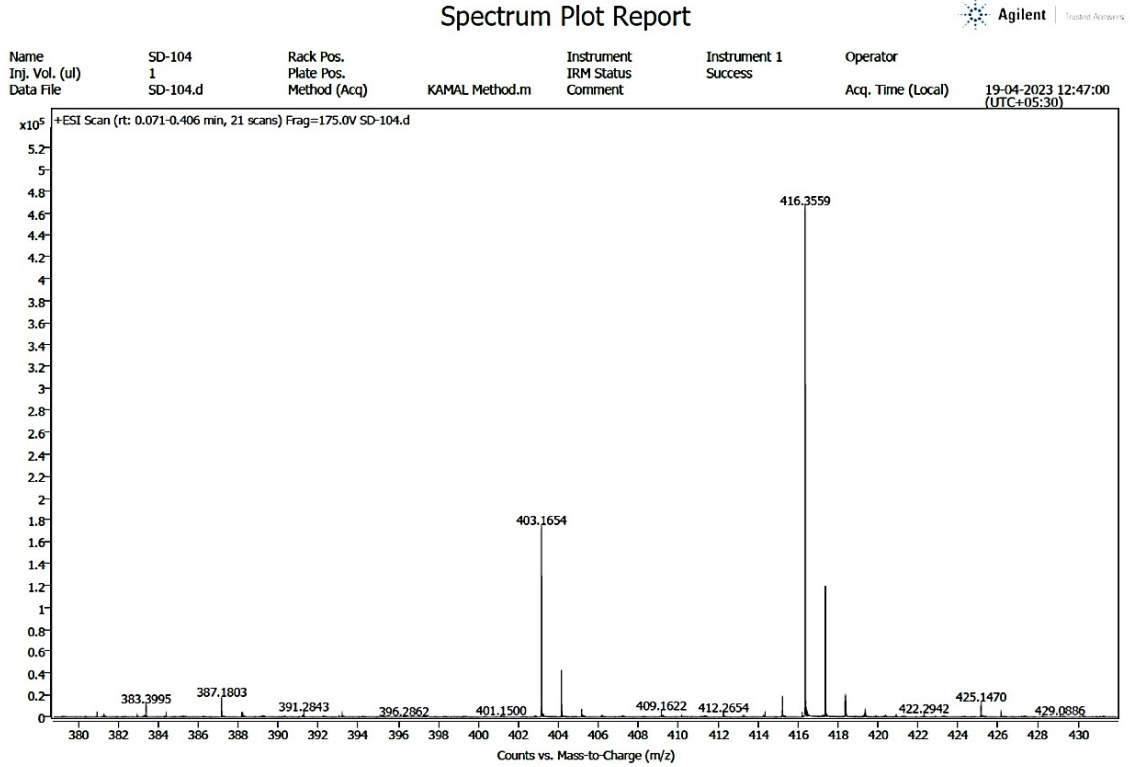

Figure S52: HRMS of Compound 4e.

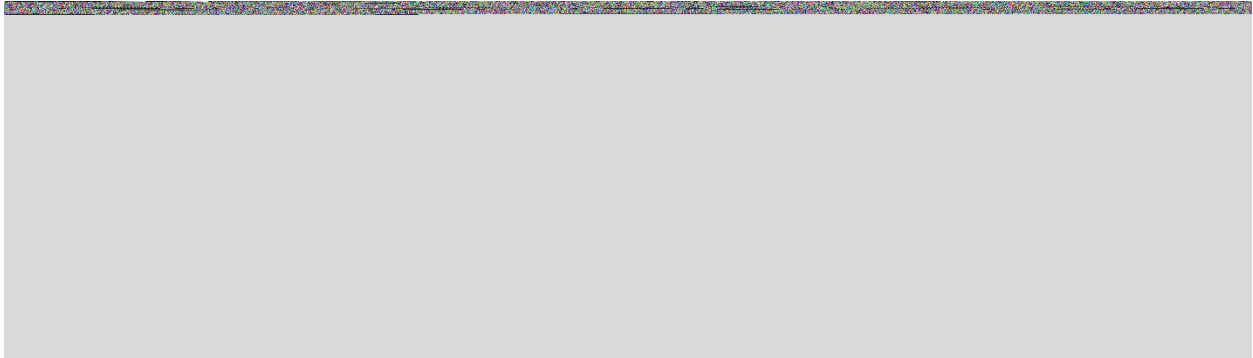

Figure S53: HRMS of Compound 4f.

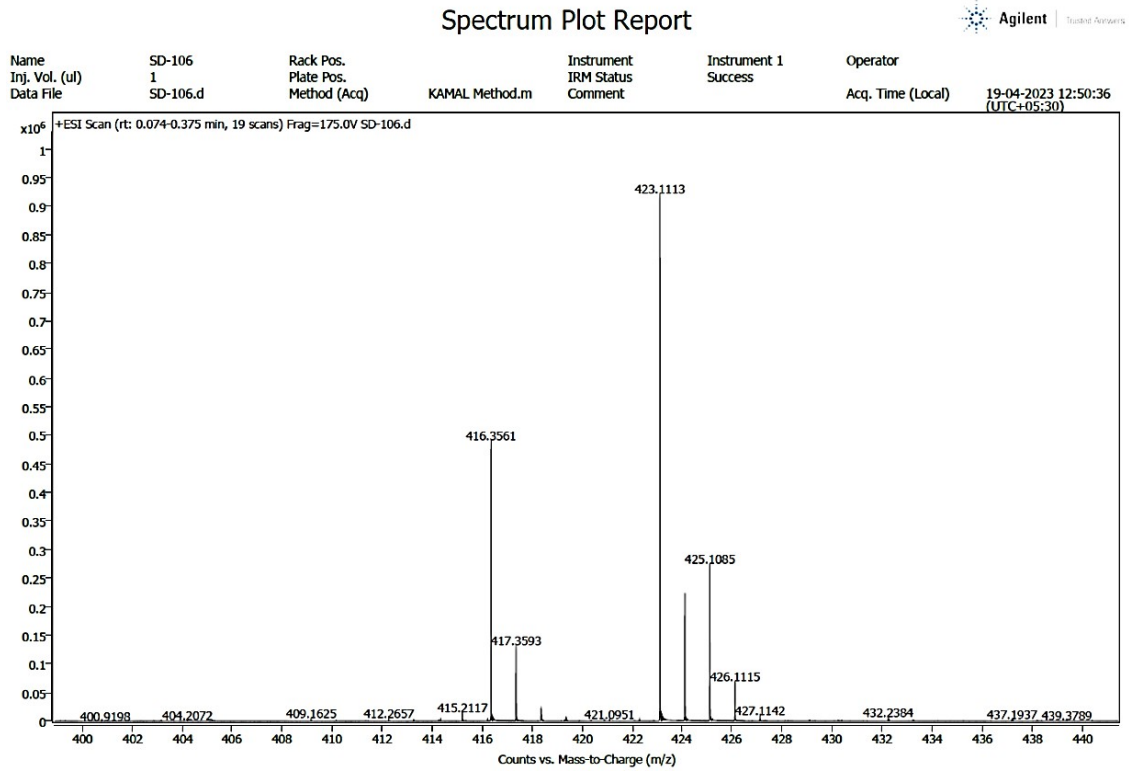

Figure S54: HRMS of Compound 4g.

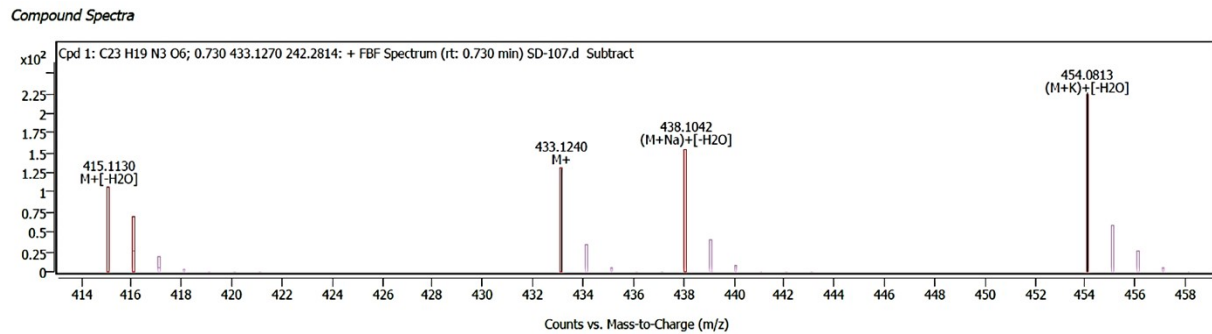

Figure S55: HRMS of Compound 4h.

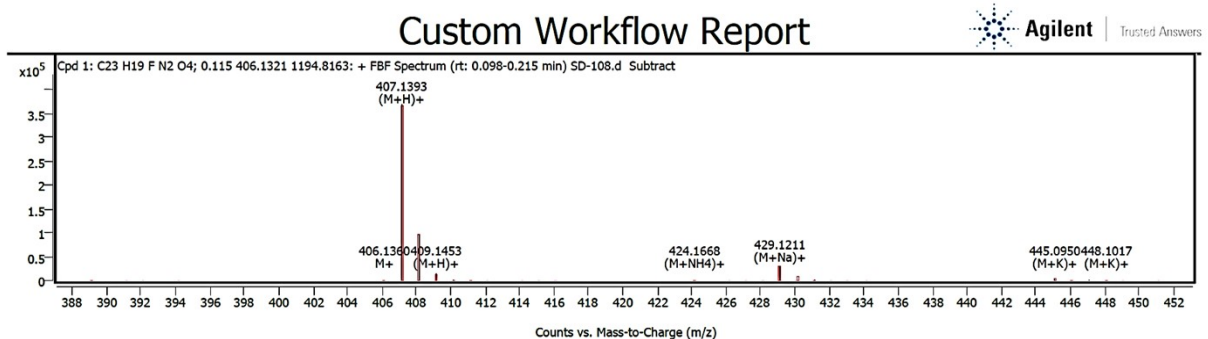

Figure S56: HRMS of Compound 4i.

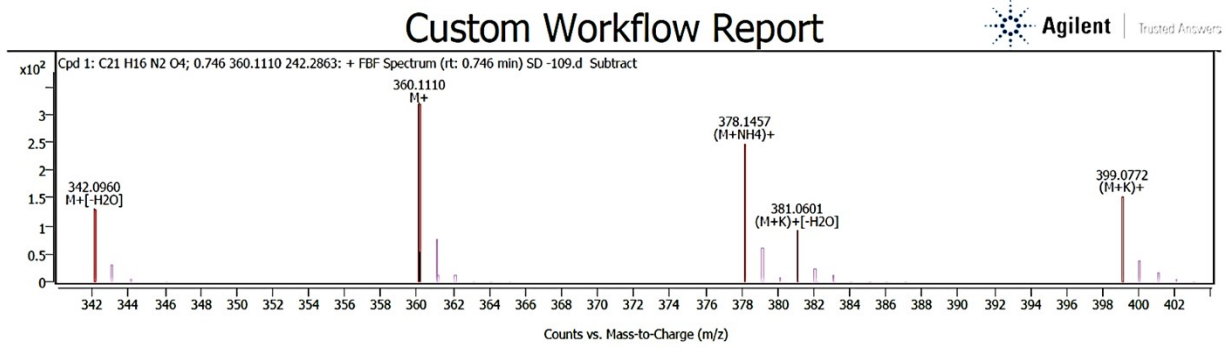

Figure S57: HRMS of Compound 4j.

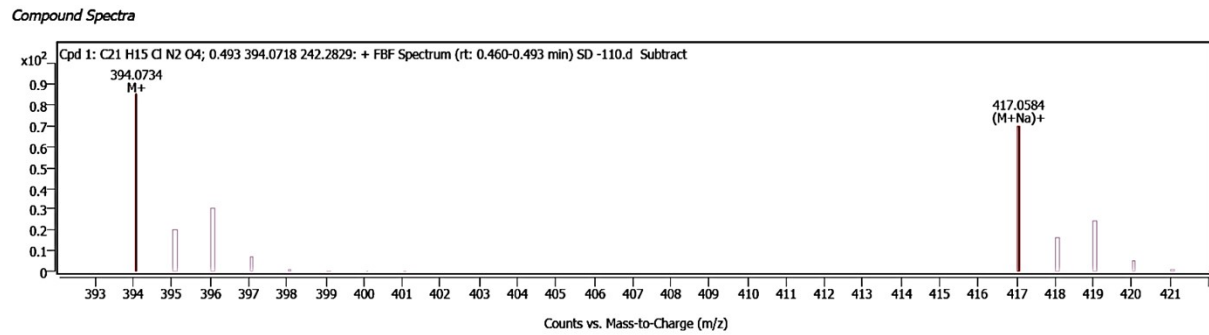

Figure S58: HRMS of Compound 4k.

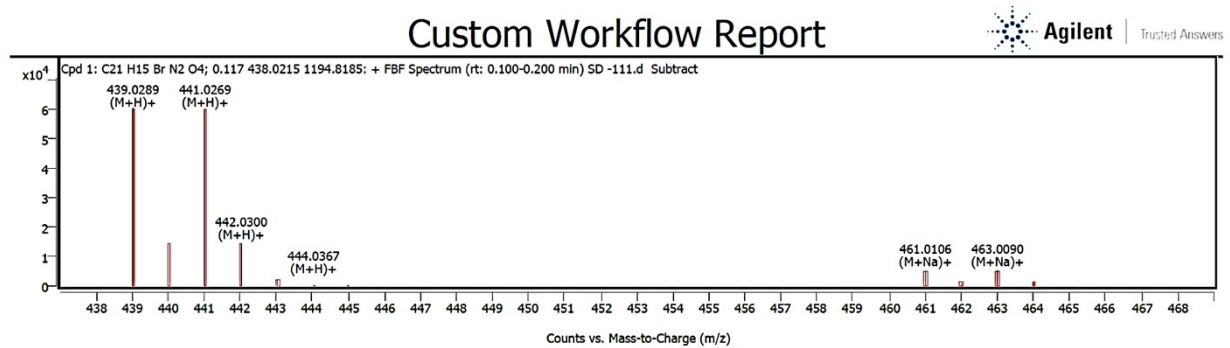

Figure S59: HRMS of Compound 4l.

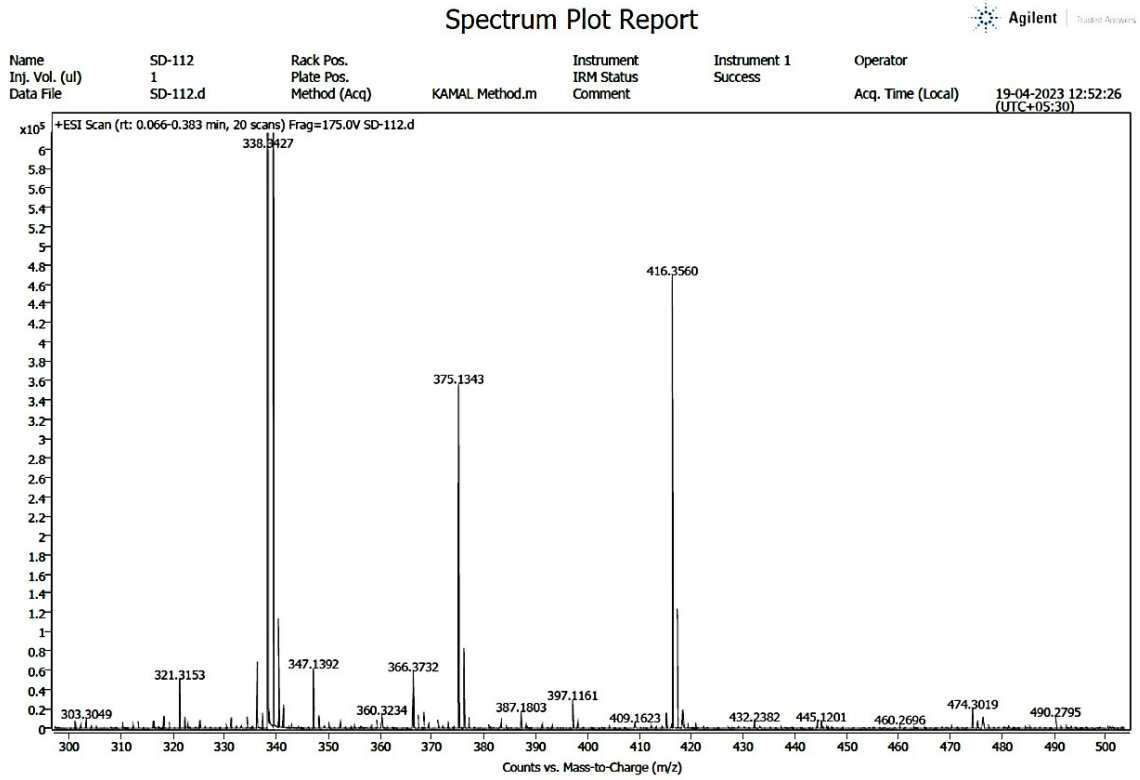

Figure S60: HRMS of Compound 4m.

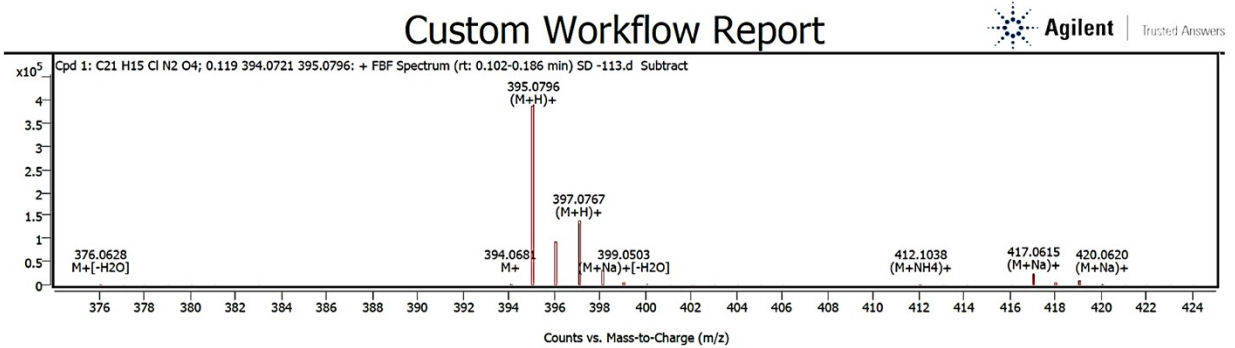

Figure S61: HRMS of Compound 4n.

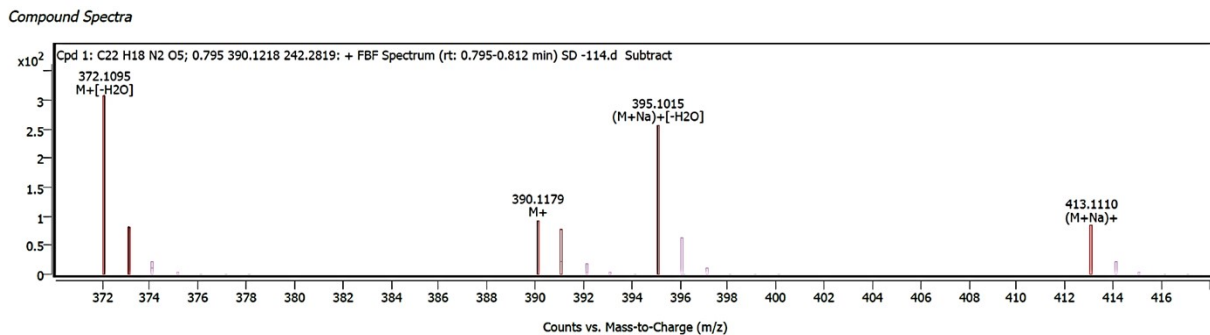

Figure S62: HRMS of Compound 4o.

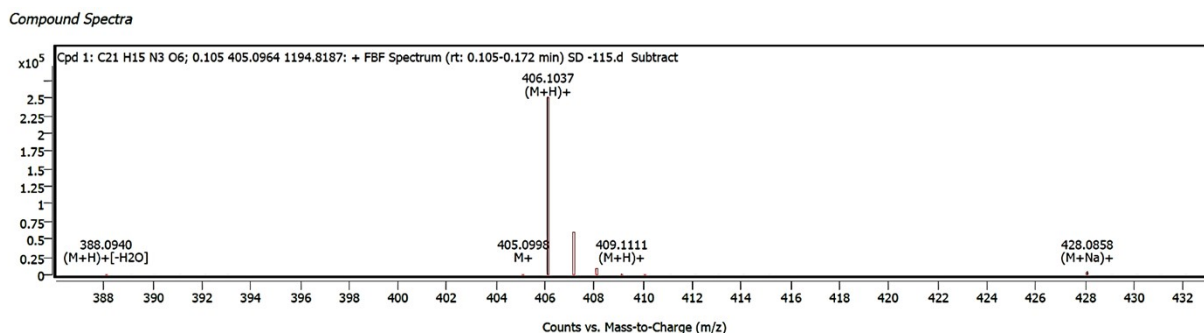

Figure S63: HRMS of Compound 4p.

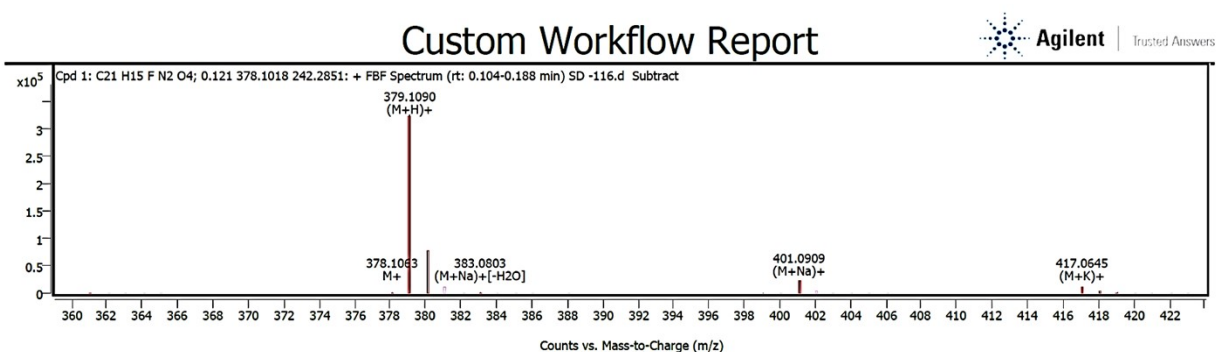

Figure S64: HRMS of Compound 4q.

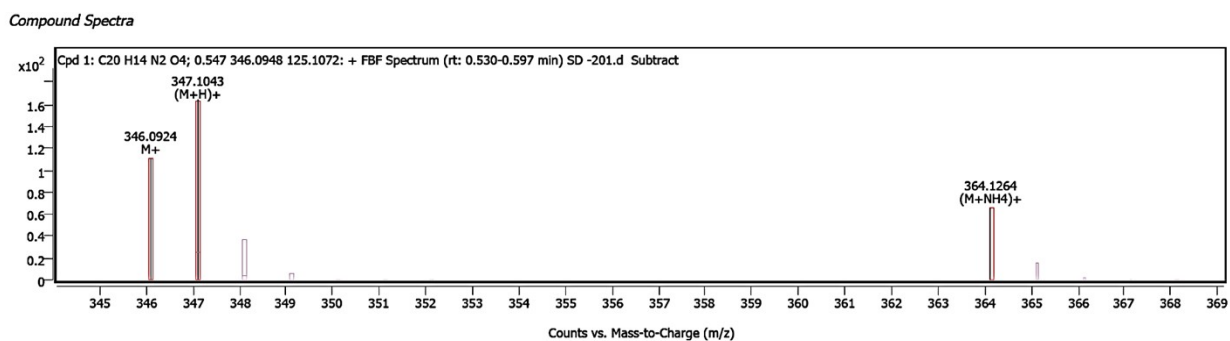

Figure S65: HRMS of Compound 4r.

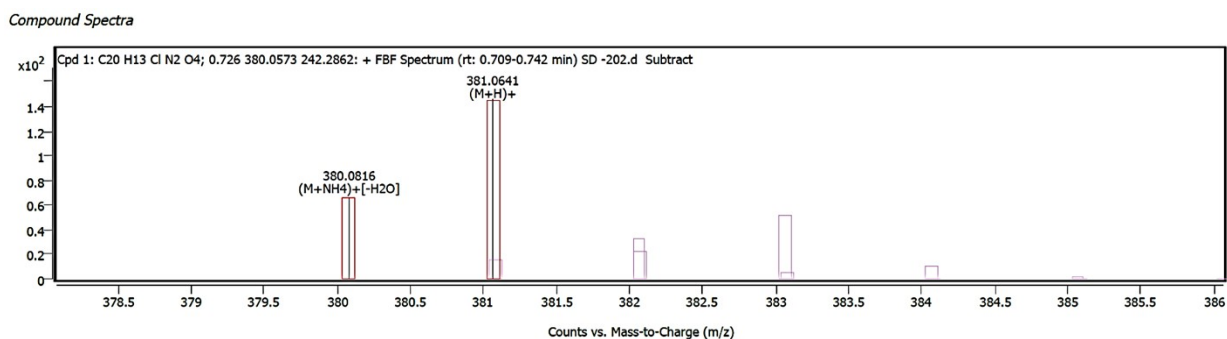

Figure S66: HRMS of Compound 4s.

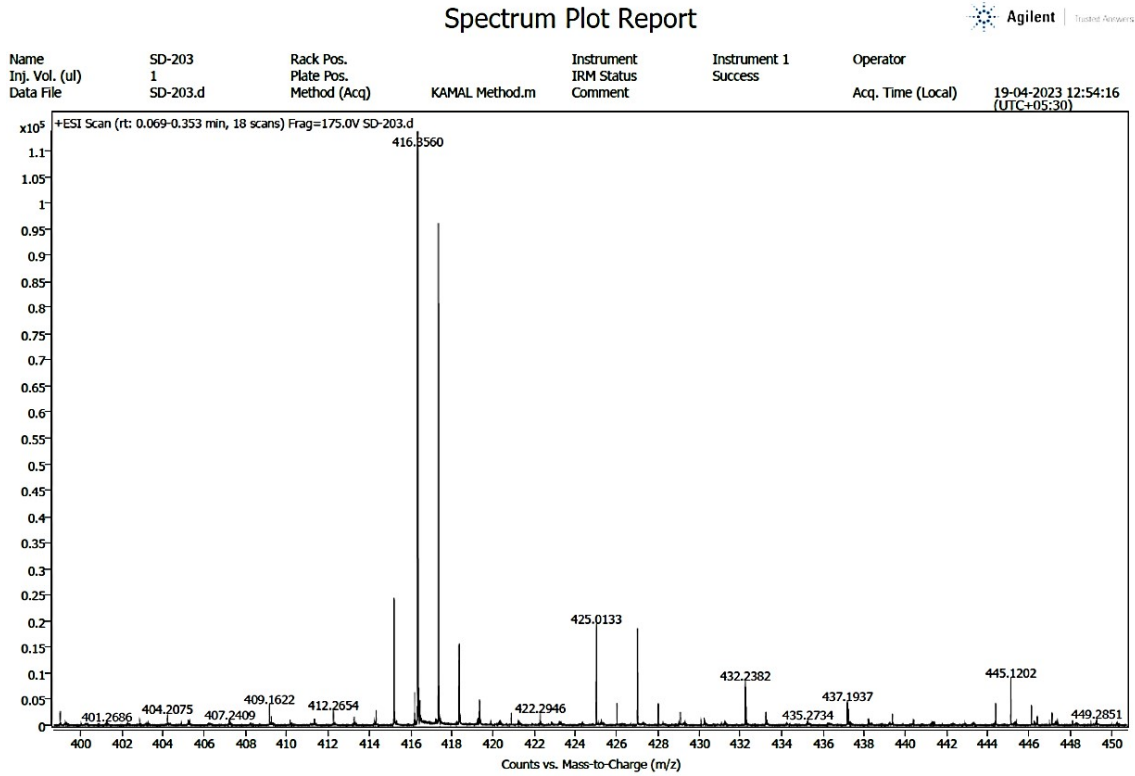

Figure S67: HRMS of Compound 4t.

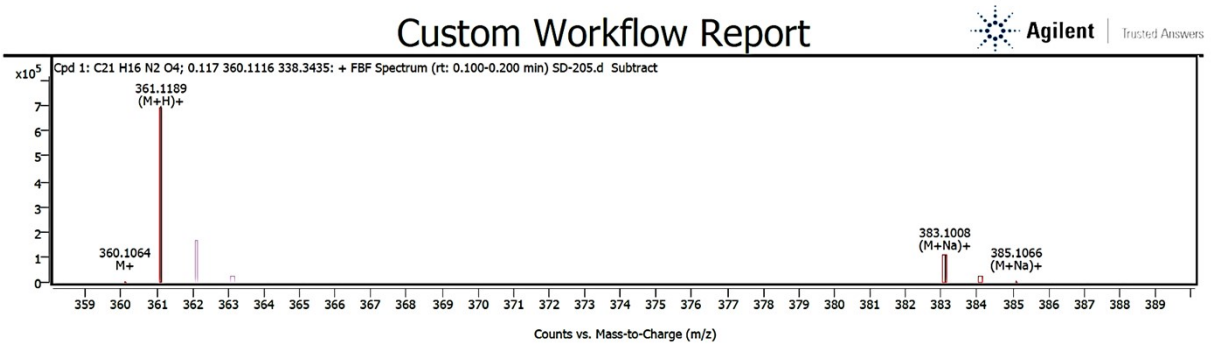

Figure S68: HRMS of Compound 4u.

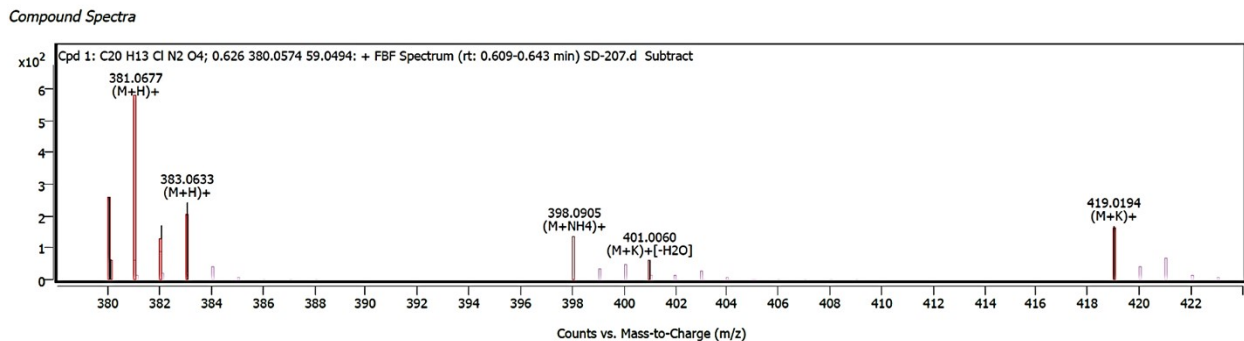



Figure S69: HRMS of Compound 4v.

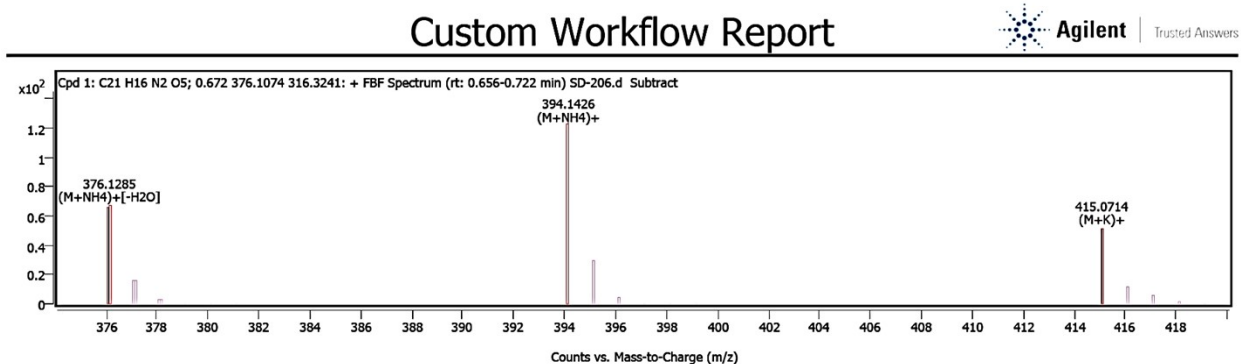

Figure S70: HRMS of Compound 4w.

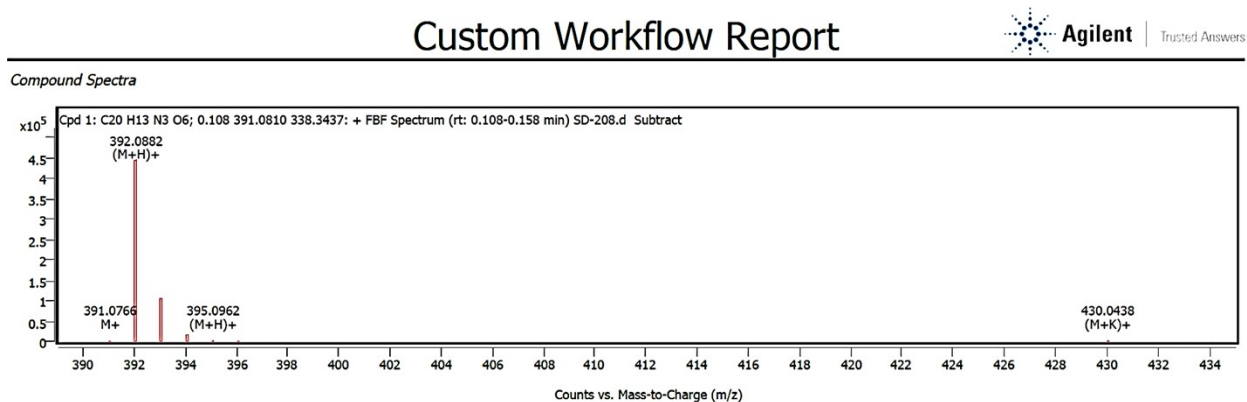

Figure S71: HRMS of Compound 4x.

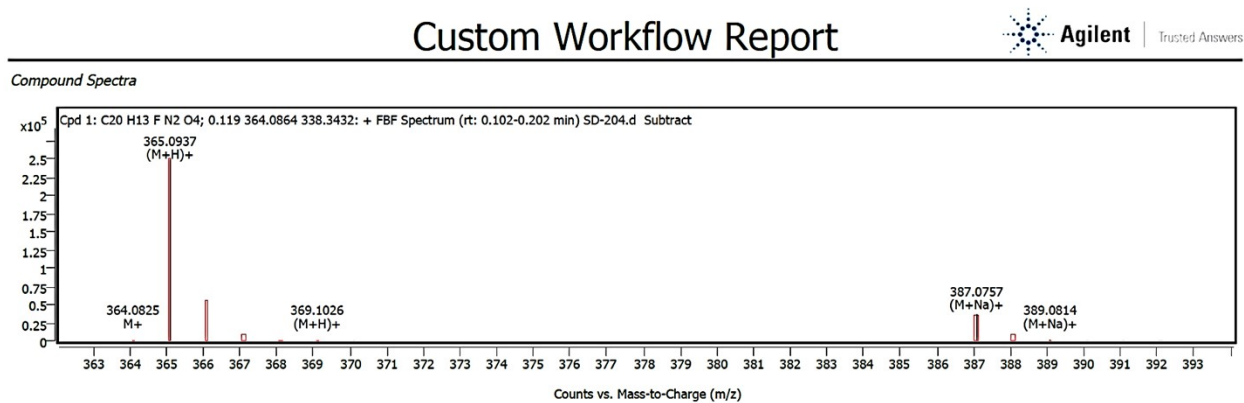

**Table S1** ADMET properties of Compound **4a** and **4v**.

| Sr. No.                    | Properties                     | <b>4a</b> | <b>4v</b> |
|----------------------------|--------------------------------|-----------|-----------|
| Physicochemical properties |                                |           |           |
| 1                          | Molecular weight (g/mol)       | 388.42    | 376.36    |
| 2                          | Number of rotational bonds     | 0         | 1         |
| 3                          | Number of H-bond acceptors     | 4         | 5         |
| 4                          | Number of H-bond donors        | 2         | 2         |
| 5                          | Molar Refractivity             | 113.3     | 105.63    |
| 6                          | Topological Polar Surface Area | 76.66     | 85.89     |
| Lipophilicity              |                                |           |           |
| 7                          | XLOGP3                         | 2.92      | 1.70      |
| 8                          | WLOGP                          | 2.58      | 1.56      |
| 9                          | MLOGP                          | 2.40      | 1.44      |
| Pharmacokinetics           |                                |           |           |
| 10                         | Gastrointestinal absorption    | High      | High      |
| 11                         | BBB permanent                  | Yes       | No        |
| 12                         | P-gp substrate                 | Yes       | Yes       |
| 13                         | CYP1A2 inhibitor               | Yes       | No        |
| 14                         | CYP2C19 inhibitor              | Yes       | Yes       |
| 15                         | CYP2C9 inhibitor               | Yes       | Yes       |
| 16                         | CYP2D6 inhibitor               | Yes       | Yes       |
| 17                         | CYP3A4 inhibitor               | Yes       | Yes       |
| Drug-likeness              |                                |           |           |
| 18                         | Lipinski                       | 0         | 0         |
| 19                         | Ghose                          | 0         | 0         |
| 20                         | Veber                          | 0         | 0         |
| 21                         | Egan                           | 0         | 0         |
| 22                         | Muegge                         | 0         | 0         |
| 23                         | Bioavailability Score          | 0.55      | 0.55      |
| Medicinal Chemistry        |                                |           |           |
| 24                         | PAINS alerts                   | 0         | 0         |
| 25                         | Brenk alerts                   | 0         | 0         |
